# Supplementary material for: Oral 11β-HSD1 inhibitor AZD4017 improves wound healing and skin integrity in adults with type 2 diabetes mellitus: a pilot randomized controlled trial
Source: PubMed Central journal article supplement (PMC8942338; doi:10.1530/eje-21-1197), 2022-02-03
Supplement: supplementary_table_1.pdf [file supplementary_table_1.pdf]

**Table S1: Full descriptive data for primary and secondary efficacy variables in the full analysis set**

| Variable                                                             | Summary          | Placebo<br>n=14      | AZD4017<br>n=14      |
|----------------------------------------------------------------------|------------------|----------------------|----------------------|
| <b>Baseline</b>                                                      |                  |                      |                      |
| 11bHSD1 activity radioassay (percent conversion per 24 hours): Day 0 | Mean (SD)        | 15.84 (6.80)         | 13.73 (6.02)         |
|                                                                      | Median (Q1, Q3)  | 15.25 (11.60, 18.40) | 10.70 (9.40, 17.40)  |
|                                                                      | Minimum, maximum | 5.20, 29.30          | 7.80, 25.70          |
|                                                                      | Nn               | 14                   | 14                   |
| 11bHSD1 activity ELISA (percent conversion per 24 hours): Day 0      | Mean (SD)        | 11.04 (8.06)         | 6.56 (3.38)          |
|                                                                      | Median (Q1, Q3)  | 6.80 (5.50, 15.60)   | 6.45 (4.20, 8.50)    |
|                                                                      | Minimum, maximum | 3.00, 26.90          | 1.40, 13.60          |
|                                                                      | Nn               | 14                   | 14                   |
| Sudomotor function Left Hand ( $\mu$ S): Day 0                       | Mean (SD)        | 54.14 (15.04)        | 56.43 (17.49)        |
|                                                                      | Median (Q1, Q3)  | 54.00 (47.00, 63.00) | 57.50 (39.00, 71.00) |
|                                                                      | Minimum, maximum | 18.00, 75.00         | 30.00, 81.00         |
|                                                                      | Nn               | 14                   | 14                   |
| Sudomotor function Right Hand ( $\mu$ S): Day 0                      | Mean (SD)        | 51.43 (15.91)        | 54.29 (16.99)        |
|                                                                      | Median (Q1, Q3)  | 54.00 (47.00, 60.00) | 56.50 (41.00, 67.00) |
|                                                                      | Minimum, maximum | 16.00, 73.00         | 22.00, 80.00         |
|                                                                      | Nn               | 14                   | 14                   |
| Sudomotor function Hands ( $\mu$ S): Day 0                           | Mean (SD)        | 52.79 (15.20)        | 55.36 (17.13)        |
|                                                                      | Median (Q1, Q3)  | 53.75 (48.00, 60.50) | 56.75 (40.00, 70.50) |
|                                                                      | Minimum, maximum | 17.00, 74.00         | 26.00, 80.50         |

| <b>Variable</b>                                 | <b>Summary</b>   | <b>Placebo<br/>n=14</b> | <b>AZD4017<br/>n=14</b> |
|-------------------------------------------------|------------------|-------------------------|-------------------------|
|                                                 | Nn               | 14                      | 14                      |
| Sudomotor function Left Foot ( $\mu$ S): Day 0  | Mean (SD)        | 63.29 (17.18)           | 73.93 (15.62)           |
|                                                 | Median (Q1, Q3)  | 65.50 (46.00, 78.00)    | 79.00 (63.00, 84.00)    |
|                                                 | Minimum, maximum | 38.00, 87.00            | 34.00, 92.00            |
|                                                 | Nn               | 14                      | 14                      |
| Sudomotor function Right Foot ( $\mu$ S): Day 0 | Mean (SD)        | 63.57 (18.00)           | 71.36 (18.94)           |
|                                                 | Median (Q1, Q3)  | 69.50 (48.00, 79.00)    | 77.00 (69.00, 82.00)    |
|                                                 | Minimum, maximum | 37.00, 87.00            | 14.00, 88.00            |
|                                                 | Nn               | 14                      | 14                      |
| Sudomotor function Feet ( $\mu$ S): Day 0       | Mean (SD)        | 63.43 (17.49)           | 72.64 (17.08)           |
|                                                 | Median (Q1, Q3)  | 67.50 (44.50, 76.50)    | 78.00 (64.00, 83.50)    |
|                                                 | Minimum, maximum | 37.50, 87.00            | 24.00, 90.00            |
|                                                 | Nn               | 14                      | 14                      |
| Sudomotor function overall ( $\mu$ S): Day 0    | Mean (SD)        | 58.11 (14.71)           | 64.00 (15.11)           |
|                                                 | Median (Q1, Q3)  | 61.00 (46.75, 67.75)    | 66.63 (63.25, 71.25)    |
|                                                 | Minimum, maximum | 27.25, 80.00            | 25.00, 84.00            |
|                                                 | Nn               | 14                      | 14                      |
| Skin hydration (A.U): Day 0                     | Mean (SD)        | 40.88 (7.79)            | 40.79 (9.19)            |
|                                                 | Median (Q1, Q3)  | 40.47 (34.50, 46.18)    | 40.35 (36.68, 45.51)    |
|                                                 | Minimum, maximum | 27.17, 54.06            | 20.58, 58.68            |
|                                                 | Nn               | 14                      | 14                      |
| Epidermal thickness ( $\mu$ m): Day 0           | Mean (SD)        | 61.30 (10.53)           | 65.96 (9.81)            |

| <b>Variable</b>                                        | <b>Summary</b>   | <b>Placebo<br/>n=14</b> | <b>AZD4017<br/>n=14</b> |
|--------------------------------------------------------|------------------|-------------------------|-------------------------|
|                                                        | Median (Q1, Q3)  | 62.76 (54.51, 69.22)    | 65.70 (60.74, 69.32)    |
|                                                        | Minimum, maximum | 37.18, 77.57            | 44.08, 86.48            |
|                                                        | Nn               | 14                      | 14                      |
| Cortisol (mcg/24 hours): Day 0                         | Mean (SD)        | 81.50 (49.27)           | 70.50 (22.24)           |
|                                                        | Median (Q1, Q3)  | 68.50 (40.00, 101.00)   | 75.50 (48.00, 84.00)    |
|                                                        | Minimum, maximum | 25.00, 202.00           | 39.00, 116.00           |
|                                                        | Nn               | 14                      | 14                      |
| Urinary [THF+alloTHF]/THE ratio: Day 0                 | Mean (SD)        | 1.06 (0.38)             | 0.91 (0.22)             |
|                                                        | Median (Q1, Q3)  | 0.96 (0.81, 1.23)       | 0.97 (0.80, 1.06)       |
|                                                        | Minimum, maximum | 0.50, 1.99              | 0.45, 1.24              |
|                                                        | Nn               | 14                      | 14                      |
| Hour 0 TEWL (Set 1, Day 0)                             | Mean (SD)        | 8.96 (3.94)             | 9.61 (3.73)             |
|                                                        | Geometric mean   | 8.24                    | 9.05                    |
|                                                        | Median (Q1, Q3)  | 8.55 (5.10, 10.70)      | 8.90 (6.80, 11.30)      |
|                                                        | Minimum, maximum | 4.70, 17.60             | 5.50, 19.30             |
|                                                        | Nn               | 14                      | 13                      |
| Number of tapes required for barrier disruption: Day 0 | Mean (SD)        | 47.14 (15.21)           | 55.54 (26.52)           |
|                                                        | Geometric mean   | 44.49                   | 50.48                   |
|                                                        | Median (Q1, Q3)  | 49.50 (33.00, 60.00)    | 51.00 (42.00, 58.00)    |
|                                                        | Minimum, maximum | 19.00, 66.00            | 22.00, 116.00           |
|                                                        | Nn               | 14                      | 13                      |
| <b>Follow-up</b>                                       |                  |                         |                         |

| <b>Variable</b>                                    | <b>Summary</b>   | <b>Placebo<br/>n=14</b> | <b>AZD4017<br/>n=14</b> |
|----------------------------------------------------|------------------|-------------------------|-------------------------|
| 11bHSD1 activity radioassay (% conv/24hrs): Day 28 | Mean (SD)        | 12.38 (4.51)            | 12.58 (5.64)            |
|                                                    | Median (Q1, Q3)  | 12.00 (8.90, 14.50)     | 12.70 (8.80, 15.60)     |
|                                                    | Minimum, maximum | 7.10, 23.40             | 3.40, 21.70             |
|                                                    | Nn               | 13                      | 14                      |
| 11bHSD1 activity ELISA (% conv/24hrs): Day 28      | Mean (SD)        | 15.27 (37.27)           | 3.81 (1.78)             |
|                                                    | Median (Q1, Q3)  | 5.60 (1.00, 7.60)       | 4.30 (3.10, 5.00)       |
|                                                    | Minimum, maximum | 0.80, 138.70            | 0.72, 6.50              |
|                                                    | Nn               | 13                      | 14                      |
| Sudomotor function Left Hand ( $\mu$ S): Day 35    | Mean (SD)        | 56.46 (11.12)           | 62.85 (14.35)           |
|                                                    | Median (Q1, Q3)  | 58.00 (48.00, 63.00)    | 64.00 (59.00, 72.00)    |
|                                                    | Minimum, maximum | 39.00, 73.00            | 28.00, 81.00            |
|                                                    | Nn               | 13                      | 13                      |
| Sudomotor function Right Hand ( $\mu$ S): Day 35   | Mean (SD)        | 54.08 (13.32)           | 59.92 (14.79)           |
|                                                    | Median (Q1, Q3)  | 55.00 (51.00, 60.00)    | 63.00 (57.00, 69.00)    |
|                                                    | Minimum, maximum | 29.00, 74.00            | 23.00, 77.00            |
|                                                    | Nn               | 13                      | 13                      |
| Sudomotor function Hands ( $\mu$ S): Day 35        | Mean (SD)        | 55.27 (11.97)           | 61.38 (14.43)           |
|                                                    | Median (Q1, Q3)  | 57.50 (49.50, 61.00)    | 63.50 (59.00, 70.50)    |
|                                                    | Minimum, maximum | 35.50, 71.50            | 25.50, 79.00            |
|                                                    | Nn               | 13                      | 13                      |
| Sudomotor function Left Foot ( $\mu$ S): Day 35    | Mean (SD)        | 68.69 (10.91)           | 70.92 (18.61)           |
|                                                    | Median (Q1, Q3)  | 70.00 (61.00, 76.00)    | 80.00 (64.00, 82.00)    |

| Variable                                   | Summary          | Placebo              | AZD4017              |
|--------------------------------------------|------------------|----------------------|----------------------|
|                                            |                  | n=14                 | n=14                 |
|                                            | Minimum, maximum | 49.00, 85.00         | 23.00, 88.00         |
|                                            | Nn               | 13                   | 13                   |
| Sudomotor function Right Foot (μS): Day 35 | Mean (SD)        | 69.31 (9.87)         | 70.31 (21.44)        |
|                                            | Median (Q1, Q3)  | 65.00 (63.00, 75.00) | 80.00 (68.00, 82.00) |
|                                            | Minimum, maximum | 51.00, 85.00         | 10.00, 85.00         |
|                                            | Nn               | 13                   | 13                   |
| Sudomotor function Feet (μS): Day 35       | Mean (SD)        | 69.00 (10.19)        | 70.62 (19.92)        |
|                                            | Median (Q1, Q3)  | 68.50 (62.00, 75.00) | 80.00 (66.00, 82.50) |
|                                            | Minimum, maximum | 50.00, 85.00         | 16.50, 84.50         |
|                                            | Nn               | 13                   | 13                   |
| Sudomotor function Overall (μS): Day 35    | Mean (SD)        | 62.13 (10.01)        | 66.00 (15.12)        |
|                                            | Median (Q1, Q3)  | 59.75 (53.75, 68.00) | 70.75 (64.50, 73.00) |
|                                            | Minimum, maximum | 49.25, 77.50         | 21.00, 78.75         |
|                                            | Nn               | 13                   | 13                   |
| Skin hydration (A.U): Day 35               | Mean (SD)        | 38.19 (9.69)         | 44.82 (10.10)        |
|                                            | Median (Q1, Q3)  | 40.52 (29.40, 46.04) | 45.28 (37.02, 46.53) |
|                                            | Minimum, maximum | 23.74, 52.86         | 30.53, 69.72         |
|                                            | Nn               | 12                   | 12                   |
| Epidermal thickness (μm): Day 35           | Mean (SD)        | 61.72 (8.35)         | 66.07 (10.49)        |
|                                            | Median (Q1, Q3)  | 57.54 (55.69, 67.30) | 66.29 (60.57, 74.37) |
|                                            | Minimum, maximum | 51.32, 77.40         | 49.13, 82.95         |
|                                            | Nn               | 13                   | 12                   |

| <b>Variable</b>                         | <b>Summary</b>   | <b>Placebo<br/>n=14</b> | <b>AZD4017<br/>n=14</b> |
|-----------------------------------------|------------------|-------------------------|-------------------------|
| Cortisol (mcg/24 hours): Day 35         | Mean (SD)        | 81.62 (44.49)           | 64.08 (22.04)           |
|                                         | Median (Q1, Q3)  | 55.00 (47.00, 120.00)   | 62.00 (52.00, 73.00)    |
|                                         | Minimum, maximum | 29.00, 164.00           | 34.00, 124.00           |
|                                         | Nn               | 13                      | 13                      |
| Urinary [THF+alloTHF]/THE ratio: Day 35 | Mean (SD)        | 1.08 (0.36)             | 0.10 (0.03)             |
|                                         | Median (Q1, Q3)  | 0.89 (0.88, 1.24)       | 0.10 (0.08, 0.12)       |
|                                         | Minimum, maximum | 0.75, 2.07              | 0.04, 0.16              |
|                                         | Nn               | 13                      | 13                      |
| Wound gap diameter (mm): Day 2          | Mean (SD)        | 1.49 (0.72)             | 0.98 (0.70)             |
|                                         | Median (Q1, Q3)  | 1.64 (1.05, 2.02)       | 0.88 (0.52, 1.29)       |
|                                         | Minimum, maximum | 0.00, 2.51              | 0.00, 2.42              |
|                                         | Nn               | 14                      | 14                      |
| Wound depth (mm): Day 7                 | Mean (SD)        | 0.60 (0.23)             | 0.59 (0.16)             |
|                                         | Median (Q1, Q3)  | 0.66 (0.57, 0.77)       | 0.59 (0.57, 0.68)       |
|                                         | Minimum, maximum | 0.00, 0.82              | 0.27, 0.86              |
|                                         | Nn               | 14                      | 14                      |
| Wound gap diameter (mm): Day 30         | Mean (SD)        | 1.44 (0.70)             | 0.65 (0.49)             |
|                                         | Median (Q1, Q3)  | 1.41 (1.14, 1.98)       | 0.81 (0.25, 0.98)       |
|                                         | Minimum, maximum | 0.00, 2.44              | 0.00, 1.43              |
|                                         | Nn               | 11                      | 12                      |
| Wound depth (mm): Day 35                | Mean (SD)        | 0.60 (0.17)             | 0.54 (0.21)             |
|                                         | Median (Q1, Q3)  | 0.63 (0.55, 0.67)       | 0.54 (0.47, 0.63)       |

| <b>Variable</b>             | <b>Summary</b>   | <b>Placebo<br/>n=14</b> | <b>AZD4017<br/>n=14</b>    |
|-----------------------------|------------------|-------------------------|----------------------------|
|                             | Minimum, maximum | 0.27, 0.90              | 0.19, 0.94                 |
|                             | Nn               | 13                      | 12                         |
| Biopsy AZD4017: Day 28      | Mean (SD)        | <5.00 (0.00)            | 1685.07 (914.43)           |
|                             | Geometric mean   | <5.00                   | 1442.44                    |
|                             | Median (Q1, Q3)  | <5.00 (<5.00, <5.00)    | 1570.00 (876.00, 2440.00)  |
|                             | Minimum, maximum | <5.00, <5.00            | 443.00, 3310.00            |
|                             | Nn               | 13                      | 14                         |
| Plasma AZD4017: Day 35      | Mean (SD)        | <5.00 (0.00)            | 6992.50 (5303.82)          |
|                             | Geometric mean   | <5.00                   | 5281.66                    |
|                             | Median (Q1, Q3)  | <5.00 (<5.00, <5.00)    | 6490.00 (2960.00, 9040.00) |
|                             | Minimum, maximum | <5.00, <5.00            | 1180.00, 19400.00          |
|                             | Nn               | 7                       | 12                         |
| Hour 3 TEWL (Set 1; Day 0)  | Mean (SD)        | 36.03 (9.66)            | 31.68 (8.00)               |
|                             | Geometric mean   | 34.94                   | 30.84                      |
|                             | Median (Q1, Q3)  | 32.50 (29.30, 43.20)    | 31.50 (26.10, 35.50)       |
|                             | Minimum, maximum | 26.30, 53.80            | 22.60, 50.70               |
|                             | Nn               | 14                      | 12                         |
| Hour 48 TEWL (Set 1; Day 2) | Mean (SD)        | 20.53 (5.64)            | 22.98 (10.04)              |
|                             | Geometric mean   | 19.79                   | 21.29                      |
|                             | Median (Q1, Q3)  | 19.90 (16.10, 26.00)    | 21.40 (15.40, 25.80)       |
|                             | Minimum, maximum | 12.40, 29.80            | 11.40, 47.80               |
|                             | Nn               | 14                      | 11                         |

| <b>Variable</b>               | <b>Summary</b>   | <b>Placebo<br/>n=14</b> | <b>AZD4017<br/>n=14</b> |
|-------------------------------|------------------|-------------------------|-------------------------|
| Hour 168 TEWL (Set 1; Day 7)  | Mean (SD)        | 13.95 (3.52)            | 21.22 (18.23)           |
|                               | Geometric mean   | 13.55                   | 16.06                   |
|                               | Median (Q1, Q3)  | 14.90 (11.10, 15.90)    | 14.50 (9.40, 24.70)     |
|                               | Minimum, maximum | 9.00, 21.10             | 6.90, 60.60             |
|                               | Nn               | 13                      | 13                      |
| Hour 3 TEWL (Set 2; Day 28)   | Mean (SD)        | 26.35 (11.63)           | 31.17 (9.81)            |
|                               | Geometric mean   | 23.77                   | 29.83                   |
|                               | Median (Q1, Q3)  | 27.80 (19.50, 28.60)    | 32.80 (21.40, 37.40)    |
|                               | Minimum, maximum | 9.00, 52.10             | 18.70, 54.90            |
|                               | Nn               | 13                      | 14                      |
| Hour 48 TEWL (Set 2; Day 30)  | Mean (SD)        | 15.65 (5.99)            | 19.64 (9.12)            |
|                               | Geometric mean   | 14.43                   | 18.21                   |
|                               | Median (Q1, Q3)  | 15.30 (13.20, 19.50)    | 16.80 (14.90, 19.60)    |
|                               | Minimum, maximum | 6.50, 25.30             | 11.70, 40.50            |
|                               | Nn               | 13                      | 14                      |
| Hour 168 TEWL (Set 2; Day 35) | Mean (SD)        | 10.72 (4.01)            | 11.72 (4.83)            |
|                               | Geometric mean   | 10.02                   | 10.84                   |
|                               | Median (Q1, Q3)  | 10.50 (8.20, 12.40)     | 10.40 (8.80, 15.10)     |
|                               | Minimum, maximum | 4.70, 18.20             | 4.90, 20.40             |
|                               | Nn               | 13                      | 12                      |
| Hour 0 TEWL (Set 3; Day 35)   | Mean (SD)        | 7.45 (2.82)             | 9.78 (4.35)             |
|                               | Geometric mean   | 6.99                    | 8.87                    |



| <b>Variable</b>                                         | <b>Summary</b>   | <b>Placebo<br/>n=14</b> | <b>AZD4017<br/>n=14</b> |
|---------------------------------------------------------|------------------|-------------------------|-------------------------|
|                                                         | Median (Q1, Q3)  | 7.00 (5.40, 9.10)       | 9.70 (7.70, 12.50)      |
|                                                         | Minimum, maximum | 3.60, 14.10             | 4.40, 18.30             |
|                                                         | Nn               | 13                      | 12                      |
| Number of tapes required for barrier disruption: Day 28 | Mean (SD)        | 42.85 (19.79)           | 60.14 (25.72)           |
|                                                         | Geometric mean   | 37.88                   | 55.55                   |
|                                                         | Median (Q1, Q3)  | 40.00 (25.00, 54.00)    | 55.00 (41.00, 70.00)    |
|                                                         | Minimum, maximum | 11.00, 77.00            | 30.00, 120.00           |
|                                                         | Nn               | 13                      | 14                      |

Nn, number non-missing; Q1, first quartile; Q3, third quartile.

**Table S2: Full descriptive data for laboratory safety variables in the safety set**

| Variable                             | Summary          | Day 0            |                  | Day 7   |         | Day 28  |         | Day 35           |                  | Day 42           |                  |
|--------------------------------------|------------------|------------------|------------------|---------|---------|---------|---------|------------------|------------------|------------------|------------------|
|                                      |                  | Placebo          | AZD4017          | Placebo | AZD4017 | Placebo | AZD4017 | Placebo          | AZD4017          | Placebo          | AZD4017          |
|                                      |                  | n=14             | n=14             | n=14    | n=14    | n=14    | n=14    | n=14             | n=14             | n=14             | n=14             |
| Body mass index (kg/m <sup>2</sup> ) | Mean (SD)        | 33.67 (13.47)    | 35.05 (5.68)     |         |         |         |         | 34.07 (14.56)    | 35.71 (6.43)     |                  |                  |
|                                      | Median           | 31.02            | 34.54            |         |         |         |         | 31.35            | 35.06            |                  |                  |
|                                      | (Q1, Q3)         | (26.52, 33.57)   | (30.65, 39.08)   |         |         |         |         | (26.51, 32.93)   | (31.38, 38.61)   |                  |                  |
|                                      | Minimum, maximum | 22.59, 75.64     | 27.04, 46.54     |         |         |         |         | 22.85, 77.85     | 27.35, 51.80     |                  |                  |
|                                      | Nn               | 14               | 14               |         |         |         |         | 13               | 13               |                  |                  |
| Waist-hip ratio                      | Mean (SD)        | 0.98 (0.08)      | 1.03 (0.08)      |         |         |         |         | 0.98 (0.07)      | 1.02 (0.07)      |                  |                  |
|                                      | Median           | 0.98             | 1.03             |         |         |         |         | 0.98             | 1.01             |                  |                  |
|                                      | (Q1, Q3)         | (0.92, 1.05)     | (0.95, 1.10)     |         |         |         |         | (0.91, 1.04)     | (0.97, 1.07)     |                  |                  |
|                                      | Minimum, maximum | 0.85, 1.13       | 0.92, 1.17       |         |         |         |         | 0.89, 1.09       | 0.92, 1.16       |                  |                  |
|                                      | Nn               | 14               | 14               |         |         |         |         | 13               | 13               |                  |                  |
| Systolic blood pressure<br>(mm Hg)   | Mean (SD)        | 135.71 (21.01)   | 140.43 (12.02)   |         |         |         |         | 143.54 (12.07)   | 128.62 (11.23)   | 136.92 (13.12)   | 137.50 (10.97)   |
|                                      | Median           | 136.00           | 140.00           |         |         |         |         | 148.00           | 126.00           | 137.00           | 140.00           |
|                                      | (Q1, Q3)         | (120.00, 145.00) | (131.00, 150.00) |         |         |         |         | (140.00, 152.00) | (123.00, 134.00) | (128.00, 146.00) | (129.00, 146.00) |
|                                      | Minimum, maximum | 101.00, 174.00   | 120.00, 162.00   |         |         |         |         | 121.00, 159.00   | 106.00, 154.00   | 118.00, 158.00   | 113.00, 150.00   |
|                                      | Nn               | 14               | 14               |         |         |         |         | 13               | 13               | 13               | 14               |
| Diastolic blood pressure<br>(mm Hg)  | Mean (SD)        | 83.86 (8.91)     | 72.64 (9.96)     |         |         |         |         | 79.62 (7.11)     | 73.69 (7.88)     | 80.00 (10.04)    | 79.29 (11.36)    |
|                                      | Median           | 83.00            | 74.00            |         |         |         |         | 80.00            | 73.00            | 80.00            | 77.00            |

| Variable                             | Summary          | Day 0          |                | Day 7          |                | Day 28         |                | Day 35         |                | Day 42         |                |
|--------------------------------------|------------------|----------------|----------------|----------------|----------------|----------------|----------------|----------------|----------------|----------------|----------------|
|                                      |                  | Placebo        | AZD4017        | Placebo        | AZD4017        | Placebo        | AZD4017        | Placebo        | AZD4017        | Placebo        | AZD4017        |
|                                      |                  | n=14           | n=14           | n=14           | n=14           | n=14           | n=14           | n=14           | n=14           | n=14           | n=14           |
|                                      | (Q1, Q3)         | (77.00, 90.00) | (63.00, 84.00) |                |                |                |                | (75.00, 84.00) | (70.00, 78.00) | (77.00, 86.00) | (71.00, 89.00) |
|                                      | Minimum, maximum | 68.00, 99.00   | 60.00, 86.00   |                |                |                |                | 67.00, 92.00   | 61.00, 91.00   | 59.00, 94.00   | 60.00, 103.00  |
|                                      | Nn               | 14             | 14             |                |                |                |                | 13             | 13             | 13             | 14             |
| HbA1c (mmol/mol)                     | Mean (SD)        | 72.29 (19.43)  | 66.00 (14.91)  | 73.77 (18.09)  | 64.31 (14.60)  | 68.92 (17.09)  | 66.00 (15.66)  | 70.00 (20.10)  | 63.67 (16.27)  | 68.46 (17.76)  | 65.43 (16.31)  |
|                                      | Median           | 72.00          | 64.00          | 71.00          | 63.00          | 67.00          | 69.00          | 71.00          | 68.00          | 69.00          | 68.00          |
|                                      | (Q1, Q3)         | (54.00, 90.00) | (59.00, 82.00) | (56.00, 90.00) | (57.00, 71.00) | (55.00, 85.00) | (54.00, 81.00) | (49.00, 86.00) | (52.00, 77.00) | (55.00, 81.00) | (53.00, 78.00) |
|                                      | Minimum, maximum | 46.00, 100.00  | 42.00, 86.00   | 49.00, 98.00   | 41.00, 85.00   | 46.00, 98.00   | 42.00, 87.00   | 45.00, 108.00  | 42.00, 86.00   | 44.00, 109.00  | 42.00, 90.00   |
|                                      | Nn               | 14             | 14             | 13             | 13             | 13             | 14             | 11             | 12             | 13             | 14             |
| High density lipoprotein<br>(mmol/l) | Mean (SD)        | 1.24 (0.31)    | 1.19 (0.27)    | 1.16 (0.29)    | 1.05 (0.25)    | 1.22 (0.30)    | 1.11 (0.25)    | 1.19 (0.30)    | 0.98 (0.26)    | 1.18 (0.36)    | 1.22 (0.28)    |
|                                      | Median           | 1.20           | 1.20           | 1.10           | 1.10           | 1.10           | 1.10           | 1.10           | 0.90           | 1.20           | 1.30           |
|                                      | (Q1, Q3)         | (1.00, 1.30)   | (0.90, 1.40)   | (0.90, 1.30)   | (0.80, 1.20)   | (1.10, 1.30)   | (0.80, 1.30)   | (1.10, 1.20)   | (0.80, 1.10)   | (1.00, 1.20)   | (0.90, 1.40)   |
|                                      | Minimum, maximum | 0.90, 2.00     | 0.70, 1.60     | 0.80, 1.80     | 0.70, 1.40     | 0.90, 1.90     | 0.70, 1.40     | 0.90, 1.90     | 0.60, 1.40     | 0.50, 1.80     | 0.80, 1.70     |
|                                      | Nn               | 14             | 14             | 14             | 14             | 13             | 14             | 12             | 12             | 12             | 13             |
| Cholesterol (mmol/l)                 | Mean (SD)        | 4.36 (1.13)    | 3.95 (0.75)    | 4.31 (1.00)    | 3.59 (0.64)    | 4.15 (0.91)    | 3.54 (0.59)    | 4.17 (0.88)    | 3.44 (0.64)    | 4.06 (1.01)    | 3.81 (0.61)    |
|                                      | Median           | 4.40           | 3.90           | 4.30           | 3.40           | 4.10           | 3.40           | 4.10           | 3.40           | 4.20           | 3.80           |
|                                      | (Q1, Q3)         | (3.60, 4.60)   | (3.40, 4.40)   | (3.40, 4.50)   | (3.20, 4.20)   | (3.70, 4.50)   | (3.20, 3.70)   | (3.80, 4.60)   | (3.00, 3.70)   | (3.70, 4.40)   | (3.40, 4.20)   |
|                                      | Minimum, maximum | 3.10, 7.50     | 2.60, 5.50     | 3.10, 6.70     | 2.60, 4.90     | 2.70, 6.30     | 2.60, 4.90     | 2.80, 6.20     | 2.70, 4.80     | 2.00, 6.00     | 2.80, 5.10     |
|                                      | Nn               | 14             | 14             | 14             | 14             | 13             | 14             | 12             | 12             | 12             | 13             |
| Triglycerides (mmol/l)               | Mean (SD)        | 1.68 (0.74)    | 2.02 (1.02)    | 2.11 (0.70)    | 2.39 (1.58)    | 1.80 (0.86)    | 1.71 (0.75)    | 2.23 (1.02)    | 2.38 (2.22)    | 1.63 (0.78)    | 1.89 (1.31)    |
|                                      | Median           | 1.60           | 1.50           | 2.00           | 2.00           | 1.50           | 1.60           | 2.00           | 1.80           | 1.70           | 1.60           |

| Variable                                | Summary          | Day 0            |                  | Day 7            |                  | Day 28           |                  | Day 35           |                  | Day 42           |                  |
|-----------------------------------------|------------------|------------------|------------------|------------------|------------------|------------------|------------------|------------------|------------------|------------------|------------------|
|                                         |                  | Placebo          | AZD4017          | Placebo          | AZD4017          | Placebo          | AZD4017          | Placebo          | AZD4017          | Placebo          | AZD4017          |
|                                         |                  | n=14             | n=14             | n=14             | n=14             | n=14             | n=14             | n=14             | n=14             | n=14             | n=14             |
|                                         | (Q1, Q3)         | (1.10, 1.90)     | (1.40, 2.50)     | (1.70, 2.70)     | (1.70, 2.30)     | (1.20, 2.00)     | (1.00, 2.00)     | (1.60, 2.80)     | (1.40, 2.10)     | (1.00, 1.90)     | (1.20, 2.00)     |
|                                         | Minimum, maximum | 1.10, 3.90       | 1.10, 4.70       | 0.70, 3.30       | 1.10, 7.10       | 1.00, 3.70       | 1.00, 3.40       | 0.80, 3.90       | 0.90, 8.90       | 0.70, 3.20       | 0.80, 6.00       |
|                                         | Nn               | 14               | 14               | 14               | 14               | 13               | 14               | 12               | 12               | 12               | 13               |
| Hemoglobin (g/l)                        | Mean (SD)        | 139.21 (14.12)   | 139.43 (11.35)   | 136.07 (13.04)   | 137.43 (10.80)   | 137.46 (10.11)   | 138.36 (10.58)   | 134.42 (12.91)   | 136.31 (11.50)   | 135.31 (13.19)   | 139.86 (13.42)   |
|                                         | Median           | 138.00           | 139.00           | 136.00           | 135.00           | 138.00           | 136.00           | 133.00           | 134.00           | 139.00           | 140.00           |
|                                         | (Q1, Q3)         | (130.00, 146.00) | (130.00, 145.00) | (126.00, 145.00) | (131.00, 144.00) | (132.00, 145.00) | (134.00, 144.00) | (126.00, 144.00) | (129.00, 140.00) | (130.00, 145.00) | (131.00, 145.00) |
|                                         | Minimum, maximum | 112.00, 168.00   | 121.00, 162.00   | 115.00, 161.00   | 122.00, 163.00   | 113.00, 153.00   | 124.00, 164.00   | 110.00, 155.00   | 122.00, 162.00   | 106.00, 151.00   | 117.00, 162.00   |
|                                         | Nn               | 14               | 14               | 14               | 14               | 13               | 14               | 12               | 13               | 13               | 14               |
| White blood cells (x10 <sup>9</sup> /l) | Mean (SD)        | 6.46 (2.55)      | 7.34 (2.04)      | 6.71 (1.83)      | 7.97 (2.12)      | 6.54 (2.11)      | 6.72 (1.57)      | 6.69 (1.96)      | 7.04 (1.94)      | 6.51 (1.97)      | 7.66 (2.18)      |
|                                         | Median           | 6.62             | 7.36             | 6.19             | 8.40             | 6.44             | 6.63             | 7.01             | 7.09             | 6.42             | 7.69             |
|                                         | (Q1, Q3)         | (4.59, 8.33)     | (6.09, 8.74)     | (5.41, 8.00)     | (6.47, 9.54)     | (5.81, 7.48)     | (6.05, 7.43)     | (5.06, 7.78)     | (5.85, 8.59)     | (5.73, 6.82)     | (7.00, 8.68)     |
|                                         | Minimum, maximum | 2.13, 11.62      | 3.21, 11.27      | 4.11, 10.35      | 3.83, 10.91      | 2.33, 10.21      | 3.30, 9.34       | 3.42, 10.49      | 3.58, 9.90       | 3.19, 10.24      | 3.65, 12.00      |
|                                         | Nn               | 14               | 14               | 14               | 14               | 13               | 14               | 12               | 13               | 13               | 14               |
| Platelets (x10 <sup>9</sup> /l)         | Mean (SD)        | 218.71 (61.85)   | 273.14 (81.37)   | 219.36 (64.89)   | 275.29 (81.60)   | 222.69 (59.57)   | 288.57 (99.85)   | 215.92 (66.59)   | 272.69 (85.96)   | 221.77 (60.01)   | 281.43 (92.00)   |
|                                         | Median           | 204.00           | 264.00           | 214.00           | 264.00           | 190.00           | 286.00           | 204.00           | 260.00           | 203.00           | 270.00           |
|                                         | (Q1, Q3)         | (171.00, 259.00) | (232.00, 335.00) | (171.00, 264.00) | (223.00, 317.00) | (180.00, 262.00) | (221.00, 331.00) | (171.00, 212.00) | (245.00, 285.00) | (170.00, 254.00) | (205.00, 349.00) |
|                                         | Minimum, maximum | 149.00, 352.00   | 117.00, 402.00   | 146.00, 381.00   | 130.00, 428.00   | 146.00, 325.00   | 124.00, 476.00   | 149.00, 365.00   | 136.00, 442.00   | 155.00, 357.00   | 133.00, 446.00   |
|                                         | Nn               | 14               | 14               | 14               | 14               | 13               | 14               | 12               | 13               | 13               | 14               |
| Red blood cells (x10 <sup>12</sup> /l)  | Mean (SD)        | 4.84 (0.49)      | 4.71 (0.48)      | 4.75 (0.54)      | 4.59 (0.45)      | 4.77 (0.39)      | 4.68 (0.47)      | 4.66 (0.47)      | 4.57 (0.44)      | 4.68 (0.49)      | 4.77 (0.53)      |

| Variable                         | Summary          | Day 0          |                | Day 7          |                | Day 28         |                | Day 35         |                | Day 42         |                |
|----------------------------------|------------------|----------------|----------------|----------------|----------------|----------------|----------------|----------------|----------------|----------------|----------------|
|                                  |                  | Placebo        | AZD4017        | Placebo        | AZD4017        | Placebo        | AZD4017        | Placebo        | AZD4017        | Placebo        | AZD4017        |
|                                  |                  | n=14           | n=14           | n=14           | n=14           | n=14           | n=14           | n=14           | n=14           | n=14           | n=14           |
|                                  | Median           | 4.80           | 4.65           | 4.79           | 4.54           | 4.70           | 4.65           | 4.65           | 4.58           | 4.55           | 4.76           |
|                                  | (Q1, Q3)         | (4.46, 5.17)   | (4.56, 5.05)   | (4.27, 5.11)   | (4.39, 4.87)   | (4.52, 4.89)   | (4.44, 4.78)   | (4.25, 5.01)   | (4.38, 4.81)   | (4.41, 4.98)   | (4.59, 4.92)   |
|                                  | Minimum, maximum | 4.13, 5.78     | 3.59, 5.68     | 3.93, 5.66     | 3.57, 5.53     | 4.24, 5.62     | 3.74, 5.60     | 4.01, 5.42     | 3.57, 5.43     | 3.96, 5.53     | 3.62, 5.97     |
|                                  | Nn               | 14             | 14             | 14             | 14             | 13             | 14             | 12             | 13             | 13             | 14             |
| Mean corpuscular volume (fl)     | Mean (SD)        | 88.43 (4.64)   | 91.21 (6.96)   | 89.71 (4.39)   | 92.14 (6.77)   | 88.15 (5.41)   | 91.21 (6.82)   | 90.00 (6.30)   | 92.23 (6.73)   | 88.08 (4.57)   | 90.50 (6.10)   |
|                                  | Median           | 88.00          | 91.00          | 90.00          | 93.00          | 87.00          | 91.00          | 91.00          | 94.00          | 88.00          | 91.00          |
|                                  | (Q1, Q3)         | (87.00, 91.00) | (86.00, 95.00) | (89.00, 92.00) | (88.00, 95.00) | (86.00, 92.00) | (84.00, 97.00) | (86.00, 93.00) | (89.00, 95.00) | (85.00, 92.00) | (84.00, 95.00) |
|                                  | Minimum, maximum | 79.00, 97.00   | 80.00, 107.00  | 80.00, 98.00   | 81.00, 105.00  | 79.00, 98.00   | 82.00, 105.00  | 76.00, 99.00   | 80.00, 104.00  | 80.00, 96.00   | 81.00, 101.00  |
|                                  | Nn               | 14             | 14             | 14             | 14             | 13             | 14             | 12             | 13             | 13             | 14             |
| Hematocrit (packed cell volume)  | Mean (SD)        | 0.43 (0.04)    | 0.43 (0.03)    | 0.43 (0.04)    | 0.42 (0.03)    | 0.42 (0.03)    | 0.43 (0.03)    | 0.42 (0.04)    | 0.42 (0.04)    | 0.41 (0.03)    | 0.43 (0.04)    |
|                                  | Median           | 0.42           | 0.43           | 0.42           | 0.41           | 0.41           | 0.42           | 0.42           | 0.41           | 0.40           | 0.43           |
|                                  | (Q1, Q3)         | (0.40, 0.46)   | (0.41, 0.45)   | (0.38, 0.46)   | (0.40, 0.43)   | (0.40, 0.43)   | (0.40, 0.45)   | (0.39, 0.45)   | (0.40, 0.43)   | (0.39, 0.45)   | (0.40, 0.45)   |
|                                  | Minimum, maximum | 0.37, 0.50     | 0.37, 0.48     | 0.37, 0.50     | 0.37, 0.49     | 0.37, 0.48     | 0.38, 0.50     | 0.35, 0.48     | 0.37, 0.49     | 0.36, 0.47     | 0.36, 0.50     |
|                                  | Nn               | 14             | 14             | 14             | 14             | 13             | 14             | 12             | 13             | 13             | 14             |
| Mean corpuscular hemoglobin (pg) | Mean (SD)        | 28.82 (2.09)   | 29.74 (2.47)   | 28.79 (1.99)   | 30.13 (2.50)   | 28.91 (2.07)   | 29.68 (2.12)   | 28.93 (2.14)   | 29.96 (2.56)   | 28.98 (2.34)   | 29.42 (2.15)   |
|                                  | Median           | 28.70          | 30.00          | 28.80          | 30.10          | 29.60          | 30.00          | 29.10          | 30.10          | 29.10          | 29.70          |
|                                  | (Q1, Q3)         | (27.70, 29.90) | (27.30, 31.50) | (27.60, 29.90) | (27.70, 32.00) | (27.70, 29.90) | (28.20, 31.10) | (28.00, 30.10) | (27.70, 31.30) | (28.10, 30.70) | (27.70, 30.90) |
|                                  | Minimum, maximum | 23.70, 31.80   | 25.60, 34.50   | 24.60, 32.30   | 26.40, 35.00   | 24.00, 32.00   | 26.10, 33.40   | 23.70, 32.40   | 26.40, 34.50   | 23.60, 32.80   | 26.20, 33.10   |

| Variable                                   | Summary          | Day 0            |                  | Day 7            |                  | Day 28           |                  | Day 35           |                  | Day 42           |                  |
|--------------------------------------------|------------------|------------------|------------------|------------------|------------------|------------------|------------------|------------------|------------------|------------------|------------------|
|                                            |                  | Placebo          | AZD4017          | Placebo          | AZD4017          | Placebo          | AZD4017          | Placebo          | AZD4017          | Placebo          | AZD4017          |
|                                            |                  | n=14             | n=14             | n=14             | n=14             | n=14             | n=14             | n=14             | n=14             | n=14             | n=14             |
|                                            | Nn               | 14               | 14               | 14               | 14               | 13               | 14               | 12               | 13               | 13               | 14               |
| Corpuscular hemoglobin concentration (g/l) | Mean (SD)        | 325.57 (10.43)   | 326.64 (8.29)    | 321.07 (11.87)   | 326.93 (9.03)    | 328.62 (13.61)   | 325.79 (7.76)    | 322.08 (11.20)   | 325.08 (8.65)    | 328.85 (15.56)   | 324.86 (6.69)    |
|                                            | Median           | 328.00           | 328.00           | 321.00           | 327.00           | 333.00           | 326.00           | 324.00           | 329.00           | 333.00           | 326.00           |
|                                            | (Q1, Q3)         | (322.00, 334.00) | (320.00, 332.00) | (311.00, 327.00) | (316.00, 334.00) | (319.00, 337.00) | (321.00, 328.00) | (311.00, 330.00) | (320.00, 330.00) | (320.00, 338.00) | (318.00, 330.00) |
|                                            | Minimum, maximum | 302.00, 337.00   | 315.00, 345.00   | 307.00, 343.00   | 314.00, 344.00   | 306.00, 347.00   | 314.00, 344.00   | 303.00, 337.00   | 306.00, 334.00   | 294.00, 350.00   | 315.00, 336.00   |
|                                            | Nn               | 14               | 14               | 14               | 14               | 13               | 14               | 12               | 13               | 13               | 14               |
| Red blood cell distribution width (%)      | Mean (SD)        | 13.88 (0.98)     | 14.12 (1.10)     | 14.43 (1.29)     | 14.27 (1.12)     | 14.02 (0.87)     | 14.08 (0.82)     | 14.23 (1.01)     | 14.44 (0.88)     | 13.80 (0.98)     | 13.74 (1.04)     |
|                                            | Median           | 13.90            | 13.90            | 14.50            | 13.90            | 13.90            | 14.00            | 14.30            | 14.20            | 13.90            | 13.60            |
|                                            | (Q1, Q3)         | (13.10, 14.50)   | (13.20, 15.30)   | (13.90, 14.80)   | (13.70, 14.70)   | (13.60, 14.30)   | (13.80, 14.60)   | (13.50, 14.40)   | (14.00, 14.90)   | (13.10, 14.10)   | (13.40, 14.40)   |
|                                            | Minimum, maximum | 12.40, 16.00     | 12.70, 15.80     | 12.70, 17.70     | 12.90, 16.80     | 12.50, 16.00     | 12.00, 15.30     | 13.20, 16.60     | 12.70, 15.90     | 12.50, 16.30     | 11.70, 15.70     |
|                                            | Nn               | 14               | 14               | 14               | 14               | 13               | 14               | 12               | 13               | 13               | 14               |
| Albumin (g/l)                              | Mean (SD)        | 39.43 (2.56)     | 39.50 (2.44)     | 39.50 (2.53)     | 40.14 (3.23)     | 38.85 (2.48)     | 38.71 (2.89)     | 39.67 (2.27)     | 40.00 (3.00)     | 38.15 (1.95)     | 38.69 (2.18)     |
|                                            | Median           | 39.00            | 40.00            | 40.00            | 40.00            | 39.00            | 39.00            | 40.00            | 39.00            | 38.00            | 39.00            |
|                                            | (Q1, Q3)         | (38.00, 41.00)   | (38.00, 41.00)   | (38.00, 41.00)   | (38.00, 42.00)   | (37.00, 41.00)   | (37.00, 40.00)   | (38.00, 41.00)   | (38.00, 41.00)   | (37.00, 40.00)   | (36.00, 40.00)   |
|                                            | Minimum, maximum | 35.00, 44.00     | 36.00, 44.00     | 35.00, 44.00     | 36.00, 49.00     | 34.00, 42.00     | 35.00, 46.00     | 36.00, 44.00     | 37.00, 46.00     | 35.00, 42.00     | 36.00, 42.00     |
|                                            | Nn               | 14               | 14               | 14               | 14               | 13               | 14               | 12               | 13               | 13               | 13               |
| Bilirubin (umol/l)                         | Mean (SD)        | 8.93 (2.97)      | 8.14 (2.82)      | 8.36 (2.17)      | 8.64 (5.53)      | 9.69 (3.35)      | 9.86 (4.49)      | 8.92 (5.55)      | 8.54 (3.80)      | 8.31 (2.14)      | 8.38 (2.66)      |
|                                            | Median           | 9.00             | 8.00             | 9.00             | 7.00             | 10.00            | 9.00             | 7.00             | 8.00             | 8.00             | 8.00             |

| Variable                 | Summary                 | Day 0          |                 | Day 7          |                 | Day 28         |                | Day 35         |                | Day 42         |                |
|--------------------------|-------------------------|----------------|-----------------|----------------|-----------------|----------------|----------------|----------------|----------------|----------------|----------------|
|                          |                         | Placebo        | AZD4017         | Placebo        | AZD4017         | Placebo        | AZD4017        | Placebo        | AZD4017        | Placebo        | AZD4017        |
|                          |                         | n=14           | n=14            | n=14           | n=14            | n=14           | n=14           | n=14           | n=14           | n=14           | n=14           |
|                          | (Q1, Q3)                | (6.00, 12.00)  | (6.00, 9.00)    | (7.00, 10.00)  | (6.00, 8.00)    | (7.00, 11.00)  | (7.00, 12.00)  | (6.00, 9.00)   | (7.00, 10.00)  | (7.00, 11.00)  | (7.00, 10.00)  |
|                          | Minimum, maximum        | 5.00, 14.00    | 4.00, 14.00     | 4.00, 12.00    | 4.00, 24.00     | 5.00, 16.00    | 5.00, 22.00    | 4.00, 24.00    | 4.00, 19.00    | 5.00, 11.00    | 5.00, 13.00    |
|                          | Nn                      | 14             | 14              | 14             | 14              | 13             | 14             | 12             | 13             | 13             | 13             |
| Alkaline phosphatase     | Mean (SD)               | 80.43 (23.76)  | 85.07 (26.08)   | 80.86 (27.04)  | 80.14 (26.38)   | 77.31 (21.55)  | 68.93 (23.03)  | 79.58 (21.21)  | 66.15 (21.10)  | 76.85 (25.66)  | 78.62 (30.06)  |
|                          | (U/l)                   |                |                 |                |                 |                |                |                |                |                |                |
|                          | Median                  | 77.00          | 88.00           | 72.00          | 79.00           | 72.00          | 70.00          | 76.00          | 69.00          | 69.00          | 79.00          |
|                          | (Q1, Q3)                | (65.00, 95.00) | (64.00, 106.00) | (66.00, 96.00) | (57.00, 102.00) | (64.00, 86.00) | (55.00, 80.00) | (71.00, 86.00) | (55.00, 75.00) | (65.00, 77.00) | (61.00, 91.00) |
|                          | Minimum, maximum        | 50.00, 145.00  | 37.00, 123.00   | 49.00, 147.00  | 38.00, 122.00   | 51.00, 129.00  | 29.00, 114.00  | 47.00, 130.00  | 27.00, 100.00  | 50.00, 145.00  | 33.00, 152.00  |
|                          | Nn                      | 14             | 14              | 14             | 14              | 13             | 14             | 12             | 13             | 13             | 13             |
| Alanine aminotransferase | Mean (SD)               | 24.64 (7.10)   | 27.43 (10.91)   | 22.93 (6.83)   | 26.14 (9.72)    | 22.69 (6.59)   | 23.07 (9.39)   | 21.67 (6.36)   | 21.15 (10.36)  | 21.15 (6.40)   | 24.31 (10.86)  |
|                          | (iu/l)                  |                |                 |                |                 |                |                |                |                |                |                |
|                          | Median                  | 25.00          | 25.00           | 23.00          | 25.00           | 20.00          | 22.00          | 21.00          | 18.00          | 19.00          | 22.00          |
|                          | (Q1, Q3)                | (19.00, 31.00) | (20.00, 33.00)  | (19.00, 30.00) | (21.00, 27.00)  | (19.00, 28.00) | (16.00, 30.00) | (18.00, 25.00) | (15.00, 23.00) | (18.00, 24.00) | (15.00, 29.00) |
|                          | Minimum, maximum        | 15.00, 36.00   | 15.00, 51.00    | 12.00, 34.00   | 14.00, 53.00    | 12.00, 33.00   | 11.00, 41.00   | 14.00, 33.00   | 10.00, 46.00   | 12.00, 34.00   | 13.00, 45.00   |
|                          | Nn                      | 14             | 14              | 14             | 14              | 13             | 14             | 12             | 13             | 13             | 13             |
| Aspartate                | Mean (SD)               | 21.00 (4.95)   | 22.64 (5.50)    | 21.07 (5.93)   | 22.36 (3.99)    | 20.77 (4.17)   | 21.36 (2.68)   | 20.92 (3.85)   | 20.67 (2.93)   | 19.00 (5.70)   | 22.18 (3.76)   |
|                          | aminotransferase (iu/l) |                |                 |                |                 |                |                |                |                |                |                |
|                          | Median                  | 21.00          | 22.00           | 20.00          | 22.00           | 21.00          | 21.00          | 20.00          | 21.00          | 20.00          | 22.00          |
|                          | (Q1, Q3)                | (19.00, 22.00) | (19.00, 26.00)  | (17.00, 24.00) | (19.00, 24.00)  | (19.00, 23.00) | (19.00, 23.00) | (19.00, 21.00) | (19.00, 23.00) | (16.00, 20.00) | (21.00, 23.00) |
|                          | Minimum, maximum        | 14.00, 32.00   | 14.00, 36.00    | 14.00, 36.00   | 18.00, 30.00    | 14.00, 28.00   | 18.00, 27.00   | 15.00, 30.00   | 16.00, 25.00   | 12.00, 34.00   | 15.00, 30.00   |
|                          | Nn                      | 14             | 14              | 14             | 14              | 13             | 14             | 12             | 12             | 12             | 11             |

| Variable                                | Summary          | Day 0            |                  | Day 7            |                  | Day 28           |                  | Day 35           |                  | Day 42           |                  |
|-----------------------------------------|------------------|------------------|------------------|------------------|------------------|------------------|------------------|------------------|------------------|------------------|------------------|
|                                         |                  | Placebo          | AZD4017          | Placebo          | AZD4017          | Placebo          | AZD4017          | Placebo          | AZD4017          | Placebo          | AZD4017          |
|                                         |                  | n=14             | n=14             | n=14             | n=14             | n=14             | n=14             | n=14             | n=14             | n=14             | n=14             |
| Gamma-glutamyl<br>transpeptidase (iu/l) | Mean (SD)        | 41.86 (33.87)    | 39.29 (29.87)    | 39.71 (32.51)    | 37.71 (30.94)    | 42.46 (31.59)    | 29.86 (21.31)    | 43.67 (36.88)    | 23.92 (15.94)    | 41.23 (33.38)    | 29.23 (20.66)    |
|                                         | Median           | 37.00            | 29.00            | 37.00            | 22.00            | 34.00            | 21.00            | 41.00            | 19.00            | 40.00            | 24.00            |
|                                         | (Q1, Q3)         | (21.00, 45.00)   | (21.00, 43.00)   | (19.00, 46.00)   | (20.00, 46.00)   | (22.00, 58.00)   | (17.00, 33.00)   | (19.00, 47.00)   | (15.00, 24.00)   | (22.00, 42.00)   | (18.00, 35.00)   |
|                                         | Minimum, maximum | 13.00, 145.00    | 16.00, 127.00    | 12.00, 143.00    | 13.00, 129.00    | 16.00, 133.00    | 14.00, 94.00     | 15.00, 147.00    | 10.00, 71.00     | 15.00, 143.00    | 6.00, 89.00      |
|                                         | Nn               | 14               | 14               | 14               | 14               | 13               | 14               | 12               | 13               | 13               | 13               |
| eGFR (ml/min/1.73 m <sup>2</sup> )      | Mean (SD)        | 81.86 (9.69)     | 79.21 (13.59)    | 77.50 (12.37)    | 71.50 (15.24)    | 79.77 (11.13)    | 75.14 (14.09)    | 76.83 (15.91)    | 73.31 (16.69)    | 77.46 (11.60)    | 76.21 (14.73)    |
|                                         | Median           | 87.00            | 85.00            | 78.00            | 70.00            | 83.00            | 72.00            | 78.00            | 69.00            | 78.00            | 77.00            |
|                                         | (Q1, Q3)         | (76.00, 90.00)   | (70.00, 90.00)   | (67.00, 90.00)   | (55.00, 88.00)   | (71.00, 90.00)   | (67.00, 90.00)   | (73.00, 90.00)   | (62.00, 90.00)   | (67.00, 90.00)   | (69.00, 90.00)   |
|                                         | Minimum, maximum | 61.00, 90.00     | 54.00, 90.00     | 55.00, 90.00     | 47.00, 90.00     | 58.00, 90.00     | 51.00, 90.00     | 39.00, 90.00     | 47.00, 90.00     | 59.00, 90.00     | 42.00, 90.00     |
|                                         | Nn               | 14               | 14               | 14               | 14               | 13               | 14               | 12               | 13               | 13               | 14               |
| Sodium (mmol/l)                         | Mean (SD)        | 138.93 (2.06)    | 140.71 (5.47)    | 139.29 (2.30)    | 140.00 (2.48)    | 138.15 (1.82)    | 138.79 (2.15)    | 140.25 (3.47)    | 139.31 (1.89)    | 138.92 (2.02)    | 138.00 (2.15)    |
|                                         | Median           | 139.00           | 140.00           | 139.00           | 140.00           | 138.00           | 139.00           | 140.00           | 139.00           | 139.00           | 138.00           |
|                                         | (Q1, Q3)         | (137.00, 140.00) | (137.00, 142.00) | (138.00, 142.00) | (139.00, 141.00) | (137.00, 139.00) | (137.00, 140.00) | (138.00, 142.00) | (138.00, 140.00) | (138.00, 140.00) | (137.00, 139.00) |
|                                         | Minimum, maximum | 136.00, 143.00   | 136.00, 158.00   | 135.00, 143.00   | 136.00, 144.00   | 135.00, 141.00   | 134.00, 142.00   | 136.00, 148.00   | 136.00, 143.00   | 135.00, 142.00   | 134.00, 142.00   |
|                                         | Nn               | 14               | 14               | 14               | 14               | 13               | 14               | 12               | 13               | 13               | 14               |
| Potassium (mmol/l)                      | Mean (SD)        | 4.46 (0.33)      | 4.63 (0.41)      | 4.79 (0.55)      | 4.59 (0.37)      | 4.49 (0.31)      | 4.74 (0.41)      | 4.48 (0.43)      | 4.52 (0.28)      | 4.65 (0.45)      | 4.63 (0.33)      |
|                                         | Median           | 4.40             | 4.60             | 4.70             | 4.60             | 4.60             | 4.70             | 4.50             | 4.50             | 4.70             | 4.70             |
|                                         | (Q1, Q3)         | (4.20, 4.70)     | (4.40, 4.80)     | (4.50, 5.00)     | (4.30, 4.90)     | (4.40, 4.70)     | (4.40, 5.10)     | (4.30, 4.80)     | (4.30, 4.60)     | (4.20, 4.90)     | (4.60, 4.70)     |
|                                         | Minimum, maximum | 3.90, 5.10       | 3.90, 5.50       | 3.70, 5.70       | 4.10, 5.30       | 3.80, 4.90       | 4.20, 5.40       | 3.50, 5.00       | 4.20, 5.10       | 3.90, 5.50       | 4.10, 5.10       |



| Variable                                 | Summary          | Day 0          |                | Day 7          |                 | Day 28         |                | Day 35         |                 | Day 42         |                |
|------------------------------------------|------------------|----------------|----------------|----------------|-----------------|----------------|----------------|----------------|-----------------|----------------|----------------|
|                                          |                  | Placebo        | AZD4017        | Placebo        | AZD4017         | Placebo        | AZD4017        | Placebo        | AZD4017         | Placebo        | AZD4017        |
|                                          |                  | n=14           | n=14           | n=14           | n=14            | n=14           | n=14           | n=14           | n=14            | n=14           | n=14           |
|                                          | Nn               | 14             | 14             | 14             | 14              | 13             | 14             | 12             | 13              | 13             | 12             |
| Urea (mmol/l)                            | Mean (SD)        | 6.96 (2.81)    | 7.25 (2.17)    | 6.91 (2.72)    | 7.24 (1.89)     | 6.79 (3.85)    | 6.56 (1.80)    | 7.67 (5.13)    | 7.60 (2.72)     | 7.07 (2.98)    | 7.57 (2.72)    |
|                                          | Median           | 6.70           | 6.40           | 6.40           | 6.60            | 5.80           | 6.60           | 6.30           | 8.50            | 6.80           | 7.30           |
|                                          | (Q1, Q3)         | (5.20, 7.30)   | (5.90, 8.70)   | (5.10, 8.90)   | (5.60, 9.20)    | (4.90, 6.80)   | (5.30, 7.90)   | (5.80, 7.40)   | (5.60, 9.30)    | (5.50, 7.30)   | (6.10, 8.30)   |
|                                          | Minimum, maximum | 3.90, 14.90    | 3.90, 11.00    | 2.60, 12.30    | 4.90, 10.60     | 3.10, 18.60    | 3.80, 9.50     | 2.70, 23.10    | 3.70, 13.30     | 3.00, 14.70    | 3.90, 15.40    |
|                                          | Nn               | 14             | 14             | 14             | 14              | 13             | 14             | 12             | 13              | 13             | 14             |
| Creatinine (umol/l)                      | Mean (SD)        | 76.64 (15.36)  | 76.21 (20.04)  | 82.36 (17.90)  | 88.57 (22.57)   | 79.08 (16.81)  | 80.93 (19.07)  | 84.42 (24.67)  | 84.69 (21.53)   | 82.08 (16.96)  | 79.93 (17.93)  |
|                                          | Median           | 77.00          | 76.00          | 82.00          | 84.00           | 81.00          | 75.00          | 81.00          | 74.00           | 82.00          | 75.00          |
|                                          | (Q1, Q3)         | (66.00, 88.00) | (60.00, 94.00) | (70.00, 97.00) | (71.00, 102.00) | (69.00, 93.00) | (67.00, 93.00) | (70.00, 87.00) | (72.00, 101.00) | (66.00, 96.00) | (70.00, 95.00) |
|                                          | Minimum, maximum | 49.00, 101.00  | 51.00, 115.00  | 55.00, 114.00  | 61.00, 129.00   | 55.00, 106.00  | 54.00, 120.00  | 55.00, 148.00  | 59.00, 125.00   | 59.00, 110.00  | 56.00, 111.00  |
|                                          | Nn               | 14             | 14             | 14             | 14              | 13             | 14             | 12             | 13              | 13             | 14             |
| Testosterone (nmol/l)                    | Mean (SD)        | 11.10 (6.25)   | 6.97 (5.48)    | 10.34 (7.47)   | 6.43 (4.94)     | 11.72 (6.75)   | 6.46 (5.01)    | 10.17 (7.94)   | 6.03 (5.08)     | 10.12 (6.47)   | 7.66 (6.43)    |
|                                          | Median           | 10.10          | 8.00           | 10.70          | 7.00            | 11.50          | 6.70           | 9.30           | 5.00            | 9.70           | 8.10           |
|                                          | (Q1, Q3)         | (8.00, 16.80)  | (0.80, 11.40)  | (6.20, 13.70)  | (1.40, 9.90)    | (8.50, 14.70)  | (1.00, 10.30)  | (8.00, 10.60)  | (1.00, 10.00)   | (6.90, 13.80)  | (0.70, 12.30)  |
|                                          | Minimum, maximum | 0.60, 22.00    | 0.40, 15.00    | 0.50, 27.50    | 0.70, 14.90     | 0.60, 27.20    | 0.80, 14.20    | 0.50, 31.50    | 0.60, 13.50     | 0.40, 25.00    | 0.60, 18.30    |
|                                          | Nn               | 14             | 14             | 14             | 14              | 12             | 14             | 12             | 13              | 13             | 14             |
| Dehydroepiandrosterone sulphate (umol/l) | Mean (SD)        | 3.53 (2.19)    | 2.91 (1.69)    | 3.56 (2.36)    | 4.91 (3.53)     | 3.03 (1.86)    | 5.35 (2.76)    | 3.49 (1.90)    | 5.03 (3.22)     | 2.82 (1.70)    | 3.55 (2.16)    |
|                                          | Median           | 2.90           | 2.50           | 3.60           | 3.50            | 3.20           | 5.30           | 3.80           | 4.60            | 2.70           | 3.40           |
|                                          | (Q1, Q3)         | (1.00, 5.00)   | (1.90, 3.40)   | (1.00, 5.30)   | (2.90, 5.50)    | (1.20, 4.60)   | (3.40, 6.70)   | (2.30, 4.90)   | (2.90, 5.40)    | (1.10, 3.40)   | (2.00, 4.30)   |
|                                          | Minimum, maximum | 1.00, 7.30     | 1.00, 7.90     | 1.00, 8.00     | 1.00, 14.70     | 1.00, 6.20     | 1.50, 11.60    | 1.00, 6.40     | 1.60, 12.60     | 1.00, 6.30     | 1.10, 9.70     |

| Variable                            | Summary          | Day 0          |                | Day 7          |                | Day 28         |                | Day 35         |                | Day 42         |                |
|-------------------------------------|------------------|----------------|----------------|----------------|----------------|----------------|----------------|----------------|----------------|----------------|----------------|
|                                     |                  | Placebo        | AZD4017        | Placebo        | AZD4017        | Placebo        | AZD4017        | Placebo        | AZD4017        | Placebo        | AZD4017        |
|                                     |                  | n=14           | n=14           | n=14           | n=14           | n=14           | n=14           | n=14           | n=14           | n=14           | n=14           |
|                                     | Nn               | 14             | 14             | 14             | 14             | 13             | 14             | 12             | 13             | 13             | 14             |
| Free thyroxine (pmol/l)             | Mean (SD)        | 14.86 (2.20)   | 15.73 (1.58)   | 14.63 (1.72)   | 15.70 (2.53)   | 14.66 (1.61)   | 15.72 (1.92)   | 14.46 (1.43)   | 15.39 (1.98)   | 13.94 (1.47)   | 15.10 (1.49)   |
|                                     | Median           | 15.20          | 15.20          | 14.70          | 15.50          | 14.60          | 16.20          | 14.60          | 14.80          | 14.00          | 15.10          |
|                                     | (Q1, Q3)         | (13.10, 16.40) | (14.80, 16.50) | (13.20, 15.30) | (13.90, 16.80) | (13.40, 15.60) | (14.30, 17.30) | (13.50, 14.90) | (14.40, 17.60) | (12.60, 15.00) | (13.80, 16.10) |
|                                     | Minimum, maximum | 11.20, 18.80   | 14.00, 20.00   | 12.10, 18.50   | 12.20, 21.50   | 12.60, 17.30   | 13.10, 19.00   | 12.70, 17.90   | 12.30, 18.40   | 12.10, 16.60   | 13.00, 18.80   |
|                                     | Nn               | 14             | 14             | 14             | 13             | 12             | 12             | 12             | 13             | 13             | 14             |
| Thyroid-stimulating hormone (mIU/l) | Mean (SD)        | 1.74 (0.66)    | 1.72 (0.63)    | 1.68 (0.56)    | 1.88 (0.76)    | 1.91 (0.84)    | 1.76 (0.81)    | 1.76 (0.75)    | 1.72 (0.64)    | 1.79 (0.71)    | 1.76 (0.93)    |
|                                     | Median           | 1.40           | 1.60           | 1.60           | 1.70           | 1.70           | 1.60           | 1.60           | 1.60           | 1.70           | 1.60           |
|                                     | (Q1, Q3)         | (1.30, 2.40)   | (1.20, 2.10)   | (1.30, 2.00)   | (1.30, 2.00)   | (1.20, 2.40)   | (1.30, 2.10)   | (1.20, 2.00)   | (1.50, 1.90)   | (1.30, 2.10)   | (1.40, 2.10)   |
|                                     | Minimum, maximum | 0.78, 2.80     | 0.94, 3.30     | 0.95, 2.90     | 0.97, 3.70     | 1.10, 3.50     | 0.68, 3.70     | 0.98, 3.40     | 0.62, 3.10     | 0.81, 3.00     | 0.51, 3.90     |
|                                     | Nn               | 14             | 14             | 14             | 13             | 12             | 12             | 12             | 13             | 13             | 14             |

**Table S3: Study treatment (placebo or AZD4017) compliance in the full analysis set**

| Definition         | Summary          | Day 2          |                | Day 7         |               | Day 28       |              | Day 30       |              | Day 35        |              |
|--------------------|------------------|----------------|----------------|---------------|---------------|--------------|--------------|--------------|--------------|---------------|--------------|
|                    |                  | Placebo        | AZD4017        | Placebo       | AZD4017       | Placebo      | AZD4017      | Placebo      | AZD4017      | Placebo       | AZD4017      |
|                    |                  | n=14           | n=14           | n=14          | n=14          | n=14         | n=14         | n=14         | n=14         | n=14          | n=14         |
| Percent            | Mean (SD)        | >99 (1)        | >99 (1)        | 99 (1)        | 99 (2)        | 99 (3)       | 98 (2)       | 97 (6)       | 99 (2)       | 98 (5)        | 98 (2)       |
|                    | Median (Q1, Q3)  | 100 (100, 100) | 100 (100, 100) | 100 (99, 100) | 100 (98, 100) | 99 (98, 100) | 99 (97, 100) | 99 (98, 100) | 99 (98, 100) | 100 (98, 100) | 99 (97, 100) |
|                    | Minimum, maximum | 97, 101        | 98, 100        | 96, 101       | 94, 101       | 91, 101      | 94, 100      | 81, 101      | 94, 101      | 84, 101       | 93, 101      |
|                    | Nn               | 13             | 10             | 13            | 14            | 12           | 13           | 13           | 11           | 12            | 14           |
| Cumulative percent | Mean (SD)        | 95 (17)        | 96 (12)        | 97 (7)        | 96 (10)       | 98 (3)       | 98 (2)       | 97 (6)       | 98 (2)       | 98 (5)        | 98 (2)       |
|                    | Median (Q1, Q3)  | 100 (100, 100) | 100 (100, 100) | 100 (96, 100) | 100 (89, 100) | 99 (97, 100) | 98 (96, 100) | 99 (98, 100) | 98 (98, 100) | 100 (98, 100) | 99 (97, 100) |
|                    | Minimum, maximum | 50, 125        | 63, 100        | 79, 107       | 71, 107       | 89, 102      | 93, 100      | 78, 102      | 93, 101      | 84, 101       | 93, 101      |
|                    | Nn               | 13             | 10             | 13            | 14            | 12           | 13           | 13           | 11           | 12            | 14           |

Nn, number non-missing; Q1, first quartile; Q3, third quartile.

**Table S4: Primary and secondary efficacy outcomes; unadjusted differences in final values between treatment groups in the full analysis set**

Multiple imputation was used to address missing data. For TEWL, integrity, wound depth and diameter, linear regression was used to estimate CIs around differences between the groups. TEWL and integrity measurements were log-transformed before analysis; differences are expressed as ratios of geometric means (AZD4017:placebo). For the remaining variables, which did not meet assumptions for linear regression, median regression was used.

| Variable                                                              | Median* |         | Difference* | Confidence interval* |                |                |                |                |
|-----------------------------------------------------------------------|---------|---------|-------------|----------------------|----------------|----------------|----------------|----------------|
|                                                                       | Placebo | AZD4017 |             | 75%                  | 80%            | 85%            | 90%            | 95%            |
|                                                                       | n=14    | n=14    |             |                      |                |                |                |                |
| 11bHSD1 activity radioassay (percent conversion per 24 hours): Day 28 | 12.18   | 12.70   | 0.52        | (-2.85, 3.90)        | (-3.25, 4.30)  | (-3.73, 4.78)  | (-4.37, 5.42)  | (-5.38, 6.43)  |
| 11bHSD1 activity ELISA (percent conversion per 24 hours): Day 28      | 5.84    | 4.30    | -1.54       | (-3.58, 0.49)        | (-3.82, 0.73)  | (-4.12, 1.03)  | (-4.50, 1.41)  | (-5.12, 2.03)  |
| Sudomotor function Left Hand (µS): Day 35                             | 58.00   | 63.15   | 5.15        | (-2.52, 12.82)       | (-3.42, 13.72) | (-4.52, 14.82) | (-5.98, 16.28) | (-8.28, 18.58) |
| Sudomotor function Right Hand (µS): Day 35                            | 54.80   | 62.60   | 7.80        | (0.35, 15.25)        | (-0.53, 16.13) | (-1.60, 17.20) | (-3.02, 18.62) | (-5.26, 20.86) |
| Sudomotor function Hands (µS): Day 35                                 | 57.02   | 62.80   | 5.78        | (-2.14, 13.69)       | (-3.08, 14.63) | (-4.22, 15.77) | (-5.73, 17.28) | (-8.11, 19.66) |
| Sudomotor function Left Foot (µS): Day 35                             | 69.40   | 76.20   | 6.80        | (-1.72, 15.32)       | (-2.73, 16.33) | (-3.95, 17.55) | (-5.57, 19.17) | (-8.13, 21.73) |
| Sudomotor function Right Foot (µS): Day 35                            | 70.10   | 79.05   | 8.95        | (0.86, 17.04)        | (-0.10, 18.00) | (-1.27, 19.17) | (-2.82, 20.72) | (-5.27, 23.17) |
| Sudomotor function Feet (µS): Day 35                                  | 69.95   | 79.53   | 9.57        | (1.75, 17.40)        | (0.83, 18.32)  | (-0.29, 19.44) | (-1.78, 20.93) | (-4.12, 23.27) |
| Sudomotor function Overall (µS): Day 35                               | 62.48   | 70.58   | 8.10        | (1.07, 15.13)        | (0.24, 15.96)  | (-0.77, 16.97) | (-2.11, 18.31) | (-4.22, 20.42) |
| Skin hydration (A.U): Day 35                                          | 40.17   | 45.39   | 5.22        | (-0.64, 11.07)       | (-1.33, 11.76) | (-2.17, 12.60) | (-3.29, 13.72) | (-5.05, 15.48) |
| Epidermal thickness (µm): Day 35                                      | 60.32   | 66.94   | 6.62        | (-1.16, 14.41)       | (-2.09, 15.34) | (-3.23, 16.47) | (-4.74, 17.99) | (-7.16, 20.40) |

|                                                         |                        |         |                    |                             |                 |                 |                 |                 |
|---------------------------------------------------------|------------------------|---------|--------------------|-----------------------------|-----------------|-----------------|-----------------|-----------------|
| Cortisol (mcg/24 hours): Day 35                         | 63.25                  | 62.40   | -0.85              | (-28.55, 26.85)             | (-31.96, 30.26) | (-36.19, 34.49) | (-41.91, 40.21) | (-51.28, 49.58) |
| Urinary [THF+alloTHF]/THE ratio: Day 35                 | 0.91                   | 0.10    | -0.81              | (-0.90, -0.72)              | (-0.91, -0.70)  | (-0.92, -0.69)  | (-0.94, -0.67)  | (-0.97, -0.64)  |
| <b>Variable</b>                                         | <b>Mean*</b>           |         | <b>Difference*</b> | <b>Confidence interval*</b> |                 |                 |                 |                 |
|                                                         | Placebo                | AZD4017 |                    | 75%                         | 80%             | 85%             | 90%             | 95%             |
|                                                         | n=14                   | n=14    |                    |                             |                 |                 |                 |                 |
| Wound gap diameter (mm): Day 2                          | 1.49                   | 0.98    | -0.51              | (-0.83, -0.20)              | (-0.87, -0.16)  | (-0.91, -0.11)  | (-0.97, -0.05)  | (-1.07, 0.04)   |
| Wound depth (mm): Day 7                                 | 0.60                   | 0.59    | -0.01              | (-0.10, 0.08)               | (-0.11, 0.09)   | (-0.12, 0.10)   | (-0.14, 0.12)   | (-0.17, 0.15)   |
| Wound gap diameter (mm): Day 30                         | 1.38                   | 0.67    | -0.71              | (-1.02, -0.39)              | (-1.06, -0.35)  | (-1.10, -0.31)  | (-1.16, -0.25)  | (-1.26, -0.15)  |
| Wound depth (mm): Day 35                                | 0.61                   | 0.54    | -0.06              | (-0.15, 0.02)               | (-0.16, 0.04)   | (-0.17, 0.05)   | (-0.19, 0.06)   | (-0.22, 0.09)   |
| <b>Variable</b>                                         | <b>Geometric mean*</b> |         | <b>Ratio*</b>      | <b>Confidence interval*</b> |                 |                 |                 |                 |
|                                                         | Placebo                | AZD4017 |                    | 75%                         | 80%             | 85%             | 90%             | 95%             |
|                                                         | n=14                   | n=14    |                    |                             |                 |                 |                 |                 |
| Hour 3 TEWL (Set 1; Day 0)                              | 34.94                  | 32.00   | 0.92               | (0.82, 1.03)                | (0.80, 1.04)    | (0.79, 1.06)    | (0.77, 1.08)    | (0.75, 1.12)    |
| Hour 48 TEWL (Set 1; Day 2)                             | 19.79                  | 21.37   | 1.08               | (0.92, 1.27)                | (0.90, 1.29)    | (0.88, 1.32)    | (0.86, 1.36)    | (0.82, 1.43)    |
| Hour 168 TEWL (Set 1; Day 7)                            | 13.52                  | 16.36   | 1.21               | (0.94, 1.56)                | (0.91, 1.61)    | (0.88, 1.67)    | (0.84, 1.75)    | (0.77, 1.89)    |
| Hour 3 TEWL (Set 2; Day 28)                             | 23.52                  | 29.83   | 1.27               | (1.05, 1.53)                | (1.03, 1.57)    | (1.00, 1.61)    | (0.96, 1.67)    | (0.91, 1.76)    |
| Hour 48 TEWL (Set 2; Day 30)                            | 14.65                  | 18.21   | 1.24               | (1.03, 1.49)                | (1.01, 1.53)    | (0.99, 1.57)    | (0.95, 1.62)    | (0.90, 1.72)    |
| Hour 168 TEWL (Set 2; Day 35)                           | 9.98                   | 10.88   | 1.09               | (0.90, 1.31)                | (0.89, 1.34)    | (0.86, 1.38)    | (0.83, 1.43)    | (0.79, 1.51)    |
| Hour 0 TEWL (Set 3; Day 35)                             | 7.09                   | 9.00    | 1.27               | (1.05, 1.54)                | (1.02, 1.58)    | (0.99, 1.62)    | (0.96, 1.68)    | (0.90, 1.78)    |
| Number of tapes required for barrier disruption: Day 28 | 38.58                  | 55.55   | 1.44               | (1.16, 1.79)                | (1.13, 1.84)    | (1.09, 1.90)    | (1.05, 1.98)    | (0.98, 2.11)    |

\*Estimated in imputed data



**Table S5: Sensitivity analysis of primary and secondary efficacy outcomes re-imputed after QC fails and outliers removed in the full analysis set**

Data were re-imputed after deleting two baseline radioassays which failed QC and one outlying ELISA assay result at day 28, TEWL readings that were potentially unreliable due to high temperatures and TEWL and WH measures which were collected earlier than scheduled. The comparison was adjusted for each variable's baseline value (this was not available for wound diameter and depth), age, sex and baseline HbA1c. All TEWL readings were adjusted using pre-disruption TEWL at baseline.

| Variable                                                              | Median*         |              | Difference* | Confidence interval* |                |                |                |                 |
|-----------------------------------------------------------------------|-----------------|--------------|-------------|----------------------|----------------|----------------|----------------|-----------------|
|                                                                       | Placebo<br>n=14 | AZD4017 n=14 |             | 75%                  | 80%            | 85%            | 90%            | 95%             |
| 11bHSD1 activity radioassay (percent conversion per 24 hours): Day 28 | 11.42           | 12.88        | 1.47        | (-1.67, 4.60)        | (-2.04, 4.97)  | (-2.50, 5.43)  | (-3.10, 6.03)  | (-4.07, 7.00)   |
| 11bHSD1 activity ELISA (percent conversion per 24 hours): Day 28      | 4.14            | 4.34         | 0.20        | (-2.11, 2.51)        | (-2.39, 2.79)  | (-2.74, 3.13)  | (-3.20, 3.59)  | (-3.94, 4.33)   |
| Sudomotor function Left Hand (µS): Day 35                             | 55.83           | 65.47        | 9.64        | (0.36, 18.92)        | (-0.76, 20.04) | (-2.14, 21.41) | (-3.98, 23.25) | (-6.94, 26.21)  |
| Sudomotor function Right Hand (µS): Day 35                            | 55.96           | 59.94        | 3.98        | (-4.24, 12.20)       | (-5.22, 13.18) | (-6.41, 14.37) | (-7.99, 15.95) | (-10.50, 18.46) |
| Sudomotor function Hands (µS): Day 35                                 | 56.69           | 63.56        | 6.87        | (-1.68, 15.42)       | (-2.70, 16.44) | (-3.95, 17.68) | (-5.61, 19.34) | (-8.24, 21.98)  |
| Sudomotor function Left Foot (µS): Day 35                             | 74.99           | 69.07        | -5.91       | (-14.19, 2.36)       | (-15.17, 3.34) | (-16.37, 4.54) | (-17.97, 6.14) | (-20.51, 8.69)  |
| Sudomotor function Right Foot (µS): Day 35                            | 73.98           | 70.17        | -3.81       | (-10.15, 2.53)       | (-10.90, 3.28) | (-11.82, 4.20) | (-13.04, 5.42) | (-14.97, 7.36)  |
| Sudomotor function Feet (µS): Day 35                                  | 74.99           | 69.64        | -5.34       | (-12.46, 1.77)       | (-13.31, 2.62) | (-14.34, 3.65) | (-15.71, 5.02) | (-17.89, 7.20)  |
| Sudomotor function Overall (µS): Day 35                               | 65.24           | 63.96        | -1.27       | (-6.66, 4.11)        | (-7.30, 4.75)  | (-8.08, 5.53)  | (-9.12, 6.57)  | (-10.77, 8.22)  |
| Skin hydration (A.U): Day 35                                          | 37.25           | 43.39        | 6.14        | (0.41, 11.88)        | (-0.27, 12.56) | (-1.12, 13.40) | (-2.23, 14.52) | (-4.02, 16.31)  |
| Epidermal thickness (µm): Day 35                                      | 63.37           | 66.06        | 2.69        | (-3.68, 9.05)        | (-4.43, 9.80)  | (-5.36, 10.73) | (-6.59, 11.96) | (-8.55, 13.92)  |

|                                                         |                        |              |                    |                 |                             |                 |                 |                 |
|---------------------------------------------------------|------------------------|--------------|--------------------|-----------------|-----------------------------|-----------------|-----------------|-----------------|
| Cortisol (mcg/24 hours): Day 35                         | 69.95                  | 66.54        | -3.41              | (-27.29, 20.47) | (-30.13, 23.31)             | (-33.61, 26.79) | (-38.22, 31.40) | (-45.56, 38.74) |
| Urinary [THF+alloTHF]/THE ratio: Day 35                 | 0.99                   | 0.13         | -0.87              | (-0.99, -0.75)  | (-1.00, -0.73)              | (-1.02, -0.72)  | (-1.04, -0.69)  | (-1.08, -0.66)  |
| <b>Variable</b>                                         | <b>Mean*</b>           |              | <b>Difference*</b> |                 | <b>Confidence interval*</b> |                 |                 |                 |
|                                                         | Placebo<br>n=14        | AZD4017 n=14 |                    | 75%             | 80%                         | 85%             | 90%             | 95%             |
| Wound gap diameter (mm): Day 2                          | 1.51                   | 0.98         | -0.52              | (-0.82, -0.23)  | (-0.85, -0.20)              | (-0.89, -0.15)  | (-0.95, -0.10)  | (-1.04, -0.01)  |
| Wound depth (mm): Day 7                                 | 0.60                   | 0.59         | -0.01              | (-0.11, 0.09)   | (-0.12, 0.10)               | (-0.13, 0.11)   | (-0.15, 0.13)   | (-0.18, 0.16)   |
| Wound gap diameter (mm): Day 30                         | 1.35                   | 0.71         | -0.64              | (-0.99, -0.30)  | (-1.03, -0.25)              | (-1.08, -0.20)  | (-1.15, -0.13)  | (-1.26, -0.02)  |
| Wound depth (mm): Day 35                                | 0.58                   | 0.56         | -0.03              | (-0.11, 0.06)   | (-0.12, 0.07)               | (-0.14, 0.09)   | (-0.15, 0.10)   | (-0.18, 0.13)   |
| <b>Variable</b>                                         | <b>Geometric mean*</b> |              | <b>Ratio*</b>      |                 | <b>Confidence interval*</b> |                 |                 |                 |
|                                                         | Placebo<br>n=14        | AZD4017 n=14 |                    | 75%             | 80%                         | 85%             | 90%             | 95%             |
| Hour 3 TEWL (Set 1; Day 0)                              | 34.97                  | 31.10        | 0.89               | (0.79, 1.00)    | (0.78, 1.02)                | (0.76, 1.04)    | (0.74, 1.06)    | (0.72, 1.10)    |
| Hour 48 TEWL (Set 1; Day 2)                             | 20.20                  | 17.72        | 0.88               | (0.77, 1.00)    | (0.75, 1.02)                | (0.74, 1.04)    | (0.72, 1.07)    | (0.69, 1.12)    |
| Hour 168 TEWL (Set 1; Day 7)                            | 13.23                  | 11.97        | 0.90               | (0.75, 1.08)    | (0.74, 1.11)                | (0.72, 1.14)    | (0.69, 1.18)    | (0.66, 1.25)    |
| Hour 3 TEWL (Set 2; Day 28)                             | 23.09                  | 30.68        | 1.33               | (1.09, 1.63)    | (1.06, 1.66)                | (1.03, 1.71)    | (0.99, 1.78)    | (0.93, 1.89)    |
| Hour 48 TEWL (Set 2; Day 30)                            | 14.65                  | 18.35        | 1.25               | (1.02, 1.53)    | (1.00, 1.57)                | (0.97, 1.61)    | (0.94, 1.68)    | (0.88, 1.78)    |
| Hour 168 TEWL (Set 2; Day 35)                           | 9.85                   | 10.70        | 1.09               | (0.88, 1.34)    | (0.86, 1.37)                | (0.83, 1.42)    | (0.80, 1.47)    | (0.75, 1.57)    |
| Hour 0 TEWL (Set 3; Day 35)                             | 6.60                   | 9.18         | 1.39               | (1.13, 1.71)    | (1.11, 1.75)                | (1.07, 1.80)    | (1.03, 1.88)    | (0.97, 2.00)    |
| Number of tapes required for barrier disruption: Day 28 | 38.98                  | 55.79        | 1.43               | (1.18, 1.74)    | (1.15, 1.78)                | (1.12, 1.84)    | (1.08, 1.91)    | (1.01, 2.02)    |

\*Estimated in imputed data, adjusted for baseline value, if applicable, and for age, sex, and baseline HbA1c.





**Table S6: Unadjusted differences in changes from baseline in primary and secondary efficacy outcomes in the full analysis set**

Multiple imputation was used to address missing data. For TEWL, integrity, wound depth and diameter, linear regression was used to estimate CIs around differences between the groups. TEWL and integrity measurements were log-transformed before analysis; for these variables changes from baseline are expressed as ratios of geometric means at follow-up to baseline and differences are expressed as ratios of geometric means between groups (AZD4017:placebo). For the remaining variables, which did not meet assumptions for linear regression, median regression was used.

| Variable                                                              | Median*      |              | Difference* | Confidence interval* |                 |                 |                 |                 |
|-----------------------------------------------------------------------|--------------|--------------|-------------|----------------------|-----------------|-----------------|-----------------|-----------------|
|                                                                       | Placebo n=14 | AZD4017 n=14 |             | 75%                  | 80%             | 85%             | 90%             | 95%             |
| 11bHSD1 activity radioassay (percent conversion per 24 hours): Day 28 | -3.10        | -0.50        | 2.60        | (-1.63, 6.83)        | (-2.13, 7.33)   | (-2.74, 7.94)   | (-3.54, 8.74)   | (-4.81, 10.01)  |
| 11bHSD1 activity ELISA (percent conversion per 24 hours): Day 28      | -3.11        | -1.80        | 1.31        | (-2.68, 5.29)        | (-3.15, 5.76)   | (-3.73, 6.34)   | (-4.48, 7.09)   | (-5.68, 8.29)   |
| Sudomotor function Left Hand (μS): Day 35                             | -0.30        | 1.70         | 2.00        | (-7.20, 11.20)       | (-8.28, 12.28)  | (-9.60, 13.60)  | (-11.35, 15.35) | (-14.11, 18.11) |
| Sudomotor function Right Hand (μS): Day 35                            | 3.65         | 5.05         | 1.40        | (-6.70, 9.50)        | (-7.66, 10.46)  | (-8.83, 11.63)  | (-10.37, 13.17) | (-12.81, 15.61) |
| Sudomotor function Hands (μS): Day 35                                 | 0.45         | 4.03         | 3.58        | (-4.65, 11.80)       | (-5.62, 12.77)  | (-6.81, 13.96)  | (-8.38, 15.53)  | (-10.86, 18.01) |
| Sudomotor function Left Foot (μS): Day 35                             | 5.75         | -4.00        | -9.75       | (-17.14, -2.36)      | (-18.01, -1.49) | (-19.07, -0.43) | (-20.48, 0.98)  | (-22.70, 3.20)  |
| Sudomotor function Right Foot (μS): Day 35                            | 6.80         | -1.80        | -8.60       | (-14.55, -2.65)      | (-15.26, -1.94) | (-16.11, -1.09) | (-17.24, 0.04)  | (-19.03, 1.83)  |
| Sudomotor function Feet (μS): Day 35                                  | 5.90         | -3.45        | -9.35       | (-15.79, -2.91)      | (-16.55, -2.15) | (-17.48, -1.22) | (-18.70, 0.00)  | (-20.63, 1.93)  |
| Sudomotor function Overall (μS): Day 35                               | 4.71         | 0.93         | -3.79       | (-8.68, 1.10)        | (-9.26, 1.68)   | (-9.97, 2.40)   | (-10.92, 3.34)  | (-12.42, 4.84)  |

| Skin hydration (A.U): Day 35                            | -2.88        | 3.06         | 5.94   | (0.67, 11.21)        | (0.05, 11.83)   | (-0.71, 12.59)  | (-1.71, 13.59)  | (-3.29, 15.17)  |
|---------------------------------------------------------|--------------|--------------|--------|----------------------|-----------------|-----------------|-----------------|-----------------|
| Epidermal thickness (µm): Day 35                        | -0.43        | -1.92        | -1.49  | (-11.12, 8.15)       | (-12.25, 9.28)  | (-13.64, 10.66) | (-15.46, 12.49) | (-18.35, 15.38) |
| Cortisol (mcg/24 hours): Day 35                         | -2.70        | -1.00        | 1.70   | (-31.61, 35.01)      | (-35.54, 38.94) | (-40.33, 43.73) | (-46.66, 50.06) | (-56.65, 60.05) |
| Urinary [THF+alloTHF]/THE ratio: Day 35                 | 0.01         | -0.84        | -0.85  | (-0.94, -0.75)       | (-0.95, -0.74)  | (-0.96, -0.73)  | (-0.98, -0.71)  | (-1.01, -0.68)  |
| Variable                                                | Ratio FU:BL* |              | Ratio* | Confidence interval* |                 |                 |                 |                 |
|                                                         | Placebo n=14 | AZD4017 n=14 |        | 75%                  | 80%             | 85%             | 90%             | 95%             |
| Hour 3 TEWL (Set 1; Day 0)                              | 4.24         | 3.49         | 0.82   | (0.69, 0.98)         | (0.68, 1.00)    | (0.66, 1.02)    | (0.64, 1.06)    | (0.61, 1.12)    |
| Hour 48 TEWL (Set 1; Day 2)                             | 2.40         | 2.33         | 0.97   | (0.80, 1.18)         | (0.78, 1.21)    | (0.75, 1.25)    | (0.73, 1.29)    | (0.68, 1.37)    |
| Hour 168 TEWL (Set 1; Day 7)                            | 1.64         | 1.78         | 1.09   | (0.85, 1.39)         | (0.82, 1.43)    | (0.80, 1.48)    | (0.76, 1.56)    | (0.70, 1.68)    |
| Hour 3 TEWL (Set 2; Day 28)                             | 2.85         | 3.25         | 1.14   | (0.89, 1.45)         | (0.87, 1.49)    | (0.84, 1.55)    | (0.80, 1.62)    | (0.74, 1.74)    |
| Hour 48 TEWL (Set 2; Day 30)                            | 1.78         | 1.98         | 1.12   | (0.89, 1.40)         | (0.87, 1.44)    | (0.84, 1.48)    | (0.80, 1.55)    | (0.75, 1.66)    |
| Hour 168 TEWL (Set 2; Day 35)                           | 1.21         | 1.19         | 0.98   | (0.78, 1.23)         | (0.76, 1.26)    | (0.73, 1.31)    | (0.70, 1.37)    | (0.66, 1.46)    |
| Hour 0 TEWL (Set 3; Day 35)                             | 0.86         | 0.98         | 1.14   | (0.86, 1.51)         | (0.83, 1.56)    | (0.80, 1.62)    | (0.76, 1.71)    | (0.70, 1.86)    |
| Number of tapes required for barrier disruption: Day 28 | 0.87         | 1.09         | 1.26   | (1.01, 1.58)         | (0.98, 1.63)    | (0.95, 1.68)    | (0.91, 1.75)    | (0.85, 1.88)    |

\*Estimated in imputed data.

BL, baseline; FU, follow-up.

**Table S7: Adjusted differences in changes from baseline in primary and secondary efficacy outcomes in the full analysis set**

Multiple imputation was used to address missing data. For TEWL, integrity, wound depth and diameter, linear regression was used to estimate CIs around differences between the groups. TEWL and integrity measurements were log-transformed before analysis; for these variables changes from baseline are expressed as ratios of geometric means at follow-up to baseline and differences are expressed as ratios of geometric means between groups (AZD4017:placebo). For the remaining variables, which did not meet assumptions for linear regression, median regression was used. The comparison was adjusted for each variable's baseline value (this was not available for wound diameter and depth), age, sex and baseline HbA1c. All TEWL readings were adjusted using pre-disruption TEWL at baseline.

| Variable                                                              | Median*      |              | Difference* | Confidence interval* |                |                |                |                |
|-----------------------------------------------------------------------|--------------|--------------|-------------|----------------------|----------------|----------------|----------------|----------------|
|                                                                       | Placebo n=14 | AZD4017 n=14 |             | 75%                  | 80%            | 85%            | 90%            | 95%            |
| 11bHSD1 activity radioassay (percent conversion per 24 hours): Day 28 | -2.99        | -1.94        | 1.05        | (-1.98, 4.09)        | (-2.34, 4.45)  | (-2.78, 4.89)  | (-3.37, 5.47)  | (-4.30, 6.41)  |
| 11bHSD1 activity ELISA (percent conversion per 24 hours): Day 28      | -3.93        | -4.47        | -0.54       | (-2.78, 1.70)        | (-3.05, 1.97)  | (-3.38, 2.30)  | (-3.82, 2.74)  | (-4.53, 3.45)  |
| Sudomotor function Left Hand (μS): Day 35                             | -0.01        | 10.38        | 10.39       | (2.03, 18.74)        | (1.04, 19.73)  | (-0.18, 20.95) | (-1.80, 22.57) | (-4.38, 25.15) |
| Sudomotor function Right Hand (μS): Day 35                            | 2.77         | 7.77         | 5.01        | (-3.07, 13.08)       | (-4.03, 14.04) | (-5.20, 15.21) | (-6.75, 16.76) | (-9.21, 19.23) |
| Sudomotor function Hands (μS): Day 35                                 | 1.71         | 8.96         | 7.25        | (-1.05, 15.56)       | (-2.04, 16.54) | (-3.24, 17.75) | (-4.84, 19.35) | (-7.39, 21.89) |
| Sudomotor function Left Foot (μS): Day 35                             | 6.91         | -0.10        | -7.01       | (-14.81, 0.79)       | (-15.73, 1.71) | (-16.86, 2.84) | (-18.36, 4.34) | (-20.73, 6.71) |
| Sudomotor function Right Foot (μS): Day 35                            | 5.49         | 1.43         | -4.07       | (-10.35, 2.21)       | (-11.09, 2.96) | (-12.00, 3.87) | (-13.21, 5.07) | (-15.12, 6.99) |
| Sudomotor function Feet (μS): Day 35                                  | 5.77         | 1.24         | -4.52       | (-11.36, 2.32)       | (-12.18, 3.13) | (-13.17, 4.12) | (-14.48, 5.43) | (-16.56, 7.51) |
| Sudomotor function Overall (μS): Day 35                               | 3.99         | 2.66         | -1.33       | (-6.76, 4.10)        | (-7.41, 4.75)  | (-8.20, 5.54)  | (-9.25, 6.59)  | (-10.92, 8.25) |

| Skin hydration (A.U): Day 35                            | -2.85        | 2.82         | 5.67   | (-0.08, 11.43)       | (-0.77, 12.12)  | (-1.62, 12.97)  | (-2.75, 14.10)  | (-4.57, 15.92)  |
|---------------------------------------------------------|--------------|--------------|--------|----------------------|-----------------|-----------------|-----------------|-----------------|
| Epidermal thickness (µm): Day 35                        | -2.38        | 3.20         | 5.58   | (-1.54, 12.69)       | (-2.40, 13.55)  | (-3.45, 14.60)  | (-4.85, 16.01)  | (-7.11, 18.26)  |
| Cortisol (mcg/24 hours): Day 35                         | -14.42       | -9.12        | 5.29   | (-19.05, 29.64)      | (-21.94, 32.53) | (-25.47, 36.06) | (-30.15, 40.74) | (-37.58, 48.16) |
| Urinary [THF+alloTHF]/THE ratio: Day 35                 | 0.01         | -0.85        | -0.87  | (-0.98, -0.75)       | (-1.00, -0.73)  | (-1.01, -0.72)  | (-1.04, -0.69)  | (-1.07, -0.66)  |
| Variable                                                | Ratio FU:BL* |              | Ratio* | Confidence interval* |                 |                 |                 |                 |
|                                                         | Placebo n=14 | AZD4017 n=14 |        | 75%                  | 80%             | 85%             | 90%             | 95%             |
| Hour 3 TEWL (Set 1; Day 0)                              | 4.03         | 3.68         | 0.91   | (0.81, 1.03)         | (0.79, 1.05)    | (0.78, 1.07)    | (0.76, 1.09)    | (0.73, 1.13)    |
| Hour 48 TEWL (Set 1; Day 2)                             | 2.35         | 2.37         | 1.01   | (0.86, 1.19)         | (0.84, 1.21)    | (0.82, 1.24)    | (0.79, 1.28)    | (0.76, 1.34)    |
| Hour 168 TEWL (Set 1; Day 7)                            | 1.62         | 1.80         | 1.11   | (0.86, 1.44)         | (0.83, 1.49)    | (0.80, 1.54)    | (0.76, 1.62)    | (0.70, 1.76)    |
| Hour 3 TEWL (Set 2; Day 28)                             | 2.65         | 3.53         | 1.33   | (1.09, 1.63)         | (1.06, 1.67)    | (1.03, 1.72)    | (0.99, 1.79)    | (0.93, 1.90)    |
| Hour 48 TEWL (Set 2; Day 30)                            | 1.68         | 2.11         | 1.26   | (1.03, 1.53)         | (1.01, 1.56)    | (0.98, 1.61)    | (0.94, 1.67)    | (0.89, 1.77)    |
| Hour 168 TEWL (Set 2; Day 35)                           | 1.16         | 1.24         | 1.07   | (0.87, 1.31)         | (0.85, 1.34)    | (0.82, 1.38)    | (0.79, 1.44)    | (0.74, 1.53)    |
| Hour 0 TEWL (Set 3; Day 35)                             | 0.80         | 1.06         | 1.33   | (1.07, 1.65)         | (1.04, 1.69)    | (1.01, 1.75)    | (0.97, 1.82)    | (0.91, 1.95)    |
| Number of tapes required for barrier disruption: Day 28 | 0.82         | 1.17         | 1.43   | (1.18, 1.74)         | (1.15, 1.78)    | (1.12, 1.84)    | (1.07, 1.91)    | (1.01, 2.02)    |

\*Estimated in imputed data, adjusted for baseline value, age, sex, and baseline HbA1c.

BL, baseline; FU, follow-up.

**Table S8: Sensitivity analysis of TEWL that adjusts for the exact timing of post-disruption measurements in the full analysis set**

Analysis models included exact measurement times to account for variations in timings; results have been provided for a) data imputed including all observed values and b) data re-imputed after deleting TEWL readings that were potentially unreliable due to high temperatures.

Linear mixed models were used to model post-baseline TEWL readings (within each set of post-disruption measurements) as a function of time since disruption. Quadratic functions were added to allow for nonlinear change over time. Baseline values and changes over time were permitted to vary between participants. TEWL measurements were log-transformed prior to analysis; differences have been expressed as ratios of geometric means (AZD4017:placebo). For each variable, the comparison was adjusted for baseline (day 0, hour 0) TEWL, age, sex and baseline HbA1c.

| Dataset    | Disruption day | Post-disruption hour | Ratio             | Confidence interval |              |              |              |     |
|------------|----------------|----------------------|-------------------|---------------------|--------------|--------------|--------------|-----|
|            |                |                      |                   | 75%                 | 80%          | 85%          | 90%          | 95% |
| Imputed    | 0              | 3                    | 0.89 (0.78, 1.00) | (0.77, 1.02)        | (0.76, 1.03) | (0.74, 1.06) | (0.72, 1.09) |     |
| Imputed    | 0              | 48                   | 1.00 (0.89, 1.14) | (0.88, 1.15)        | (0.86, 1.17) | (0.84, 1.20) | (0.81, 1.24) |     |
| Imputed    | 0              | 168                  | 1.17 (0.94, 1.45) | (0.91, 1.49)        | (0.89, 1.53) | (0.85, 1.59) | (0.80, 1.69) |     |
| Imputed    | 28             | 3                    | 1.28 (1.08, 1.52) | (1.06, 1.55)        | (1.04, 1.59) | (1.01, 1.64) | (0.96, 1.72) |     |
| Imputed    | 28             | 48                   | 1.25 (1.07, 1.47) | (1.05, 1.50)        | (1.03, 1.53) | (1.00, 1.57) | (0.96, 1.64) |     |
| Imputed    | 28             | 168                  | 1.12 (0.93, 1.34) | (0.92, 1.36)        | (0.89, 1.40) | (0.86, 1.44) | (0.82, 1.52) |     |
| Re-imputed | 0              | 3                    | 0.88 (0.78, 1.00) | (0.77, 1.01)        | (0.76, 1.03) | (0.74, 1.05) | (0.72, 1.08) |     |
| Re-imputed | 0              | 48                   | 0.90 (0.80, 1.01) | (0.79, 1.03)        | (0.78, 1.04) | (0.76, 1.07) | (0.74, 1.10) |     |
| Re-imputed | 0              | 168                  | 0.90 (0.77, 1.04) | (0.76, 1.06)        | (0.74, 1.08) | (0.72, 1.11) | (0.69, 1.16) |     |
| Re-imputed | 28             | 3                    | 1.28 (1.08, 1.51) | (1.06, 1.54)        | (1.03, 1.58) | (1.00, 1.63) | (0.95, 1.71) |     |

| Dataset    | Disruption day | Post-disruption hour | Ratio | Confidence interval |              |              |              |              |
|------------|----------------|----------------------|-------|---------------------|--------------|--------------|--------------|--------------|
|            |                |                      |       | 75%                 | 80%          | 85%          | 90%          | 95%          |
| Re-imputed | 28             | 48                   | 1.25  | (1.07, 1.47)        | (1.05, 1.50) | (1.02, 1.53) | (1.00, 1.58) | (0.95, 1.65) |
| Re-imputed | 28             | 168                  | 1.11  | (0.93, 1.33)        | (0.91, 1.36) | (0.89, 1.39) | (0.86, 1.44) | (0.82, 1.51) |

**Table S9: Sensitivity analysis of primary and secondary efficacy outcomes in available case data in the full analysis set**

For TEWL, integrity, wound depth and diameter, linear regression was used to estimate CIs around differences between the groups. TEWL and integrity measurements were log-transformed before analysis; differences are expressed as ratios of geometric means (AZD4017:placebo). For the remaining variables, which did not meet assumptions for linear regression, median regression was used. The comparison was adjusted for each variable's baseline value (this was not available for wound diameter and depth), age, sex and baseline HbA1c. All TEWL readings were adjusted using pre-disruption TEWL at baseline.

| Variable                                                                 | Estimated median* |              | Difference* | Confidence interval* |                 |                 |                |                |
|--------------------------------------------------------------------------|-------------------|--------------|-------------|----------------------|-----------------|-----------------|----------------|----------------|
|                                                                          | Placebo           | AZD4017      |             | 75%                  | 80%             | 85%             | 90%            | 95%            |
| 11bHSD1 activity radioassay (percent conversion per 24 hours):<br>Day 28 | 11.29 (n=13)      | 12.33 (n=14) | 1.03        | (-1.64, 3.71)        | (-1.84, 3.91)   | (-3.11, 5.17)   | (-3.38, 5.44)  | (-4.11, 6.18)  |
| 11bHSD1 activity ELISA (percent conversion per 24 hours):<br>Day 28      | 5.83 (n=13)       | 4.44 (n=14)  | -1.39       | (-3.54, 0.75)        | (-3.63, 0.85)   | (-3.74, 0.95)   | (-4.52, 1.73)  | (-5.22, 2.43)  |
| Sudomotor function Left Hand (µS): Day 35                                | 55.60 (n=13)      | 65.98 (n=13) | 10.39       | (2.28, 18.50)        | (1.66, 19.12)   | (0.06, 20.72)   | (-1.42, 22.19) | (-3.73, 24.51) |
| Sudomotor function Right Hand (µS): Day 35                               | 55.71 (n=13)      | 59.12 (n=13) | 3.41        | (-5.25, 12.07)       | (-5.60, 12.42)  | (-7.50, 14.32)  | (-8.09, 14.91) | (-9.75, 16.57) |
| Sudomotor function Hands (µS): Day 35                                    | 55.06 (n=13)      | 57.98 (n=13) | 2.92        | (-4.53, 10.37)       | (-5.43, 11.27)  | (-6.78, 12.62)  | (-8.36, 14.20) | (-9.22, 15.05) |
| Sudomotor function Left Foot (µS): Day 35                                | 75.91 (n=13)      | 68.68 (n=13) | -7.23       | (-12.33, -2.14)      | (-12.54, -1.93) | (-12.78, -1.69) | (-18.65, 4.18) | (-19.52, 5.05) |
| Sudomotor function Right Foot (µS): Day 35                               | 72.69 (n=13)      | 67.83 (n=13) | -4.85       | (-10.63, 0.92)       | (-10.86, 1.16)  | (-11.77, 2.07)  | (-12.15, 2.44) | (-16.40, 6.70) |
| Sudomotor function Feet (µS): Day 35                                     | 74.14 (n=13)      | 69.14 (n=13) | -5.00       | (-9.45, -0.55)       | (-10.47, 0.47)  | (-13.18, 3.18)  | (-13.77, 3.78) | (-16.92, 6.93) |
| Sudomotor function Overall (µS): Day 35                                  | 64.51 (n=13)      | 64.64 (n=13) | 0.13        | (-5.02, 5.28)        | (-7.17, 7.43)   | (-7.54, 7.79)   | (-7.95, 8.21)  | (-9.27, 9.52)  |
| Skin hydration (A.U): Day 35                                             | 38.89 (n=12)      | 43.30 (n=12) | 4.41        | (-0.99, 9.80)        | (-1.21, 10.02)  | (-1.92, 10.73)  | (-3.40, 12.21) | (-5.83, 14.64) |
| Epidermal thickness (µm): Day 35                                         | 61.95 (n=13)      | 65.53 (n=12) | 3.58        | (-3.77, 10.93)       | (-4.08, 11.23)  | (-4.62, 11.78)  | (-5.25, 12.41) | (-6.00, 13.15) |



| Cortisol (mcg/24 hours): Day 35                         | 60.40 (n=13)              | 69.11 (n=13) | 8.71        | (-19.06, 36.48) | (-20.20, 37.61)      | (-21.78, 39.19) | (-24.23, 41.65) | (-33.39, 50.80) |  |
|---------------------------------------------------------|---------------------------|--------------|-------------|-----------------|----------------------|-----------------|-----------------|-----------------|--|
| Urinary [THF+alloTHF]/THE ratio: Day 35                 | 0.99 (n=13)               | 0.17 (n=13)  | -0.82       | (-0.97, -0.67)  | (-0.98, -0.66)       | (-0.99, -0.65)  | (-1.01, -0.63)  | (-1.02, -0.62)  |  |
|                                                         | Estimated mean*           |              | Difference* |                 | Confidence interval* |                 |                 |                 |  |
|                                                         | Placebo                   | AZD4017      |             | 75%             | 80%                  | 85%             | 90%             | 95%             |  |
| Wound gap diameter (mm): Day 2                          | 1.51 (n=14)               | 0.98 (n=14)  | -0.52       | (-0.82, -0.23)  | (-0.85, -0.20)       | (-0.89, -0.15)  | (-0.95, -0.10)  | (-1.04, -0.01)  |  |
| Wound depth (mm): Day 7                                 | 0.60 (n=14)               | 0.59 (n=14)  | -0.01       | (-0.10, 0.09)   | (-0.11, 0.10)        | (-0.13, 0.11)   | (-0.14, 0.13)   | (-0.17, 0.16)   |  |
| Wound gap diameter (mm): Day 30                         | 1.35 (n=11)               | 0.69 (n=12)  | -0.66       | (-1.00, -0.31)  | (-1.05, -0.27)       | (-1.10, -0.22)  | (-1.16, -0.15)  | (-1.27, -0.05)  |  |
| Wound depth (mm): Day 35                                | 0.59 (n=13)               | 0.56 (n=12)  | -0.02       | (-0.11, 0.07)   | (-0.12, 0.08)        | (-0.14, 0.09)   | (-0.15, 0.11)   | (-0.18, 0.13)   |  |
|                                                         | Estimated geometric mean* |              | Ratio*      |                 | Confidence interval* |                 |                 |                 |  |
|                                                         | Placebo                   | AZD4017      |             | 75%             | 80%                  | 85%             | 90%             | 95%             |  |
| Hour 3 TEWL (Set 1; Day 0)                              | 34.95 (n=14)              | 31.26 (n=12) | 0.89        | (0.79, 1.01)    | (0.78, 1.03)         | (0.76, 1.05)    | (0.74, 1.07)    | (0.72, 1.12)    |  |
| Hour 48 TEWL (Set 1; Day 2)                             | 20.37 (n=14)              | 20.13 (n=11) | 0.99        | (0.84, 1.17)    | (0.82, 1.19)         | (0.80, 1.22)    | (0.77, 1.26)    | (0.74, 1.33)    |  |
| Hour 168 TEWL (Set 1; Day 7)                            | 14.23 (n=13)              | 15.25 (n=13) | 1.07        | (0.82, 1.40)    | (0.79, 1.44)         | (0.76, 1.50)    | (0.73, 1.58)    | (0.67, 1.71)    |  |
| Hour 3 TEWL (Set 2; Day 28)                             | 23.47 (n=13)              | 30.51 (n=13) | 1.30        | (1.06, 1.60)    | (1.03, 1.64)         | (1.00, 1.69)    | (0.96, 1.76)    | (0.90, 1.87)    |  |
| Hour 48 TEWL (Set 2; Day 30)                            | 14.44 (n=13)              | 18.28 (n=13) | 1.27        | (1.03, 1.56)    | (1.00, 1.60)         | (0.97, 1.64)    | (0.94, 1.71)    | (0.88, 1.82)    |  |
| Hour 168 TEWL (Set 2; Day 35)                           | 10.11 (n=13)              | 10.88 (n=12) | 1.08        | (0.87, 1.33)    | (0.85, 1.37)         | (0.82, 1.41)    | (0.79, 1.47)    | (0.74, 1.57)    |  |
| Hour 0 TEWL (Set 3; Day 35)                             | 6.88 (n=13)               | 9.02 (n=12)  | 1.31        | (1.05, 1.65)    | (1.02, 1.69)         | (0.98, 1.75)    | (0.94, 1.83)    | (0.88, 1.96)    |  |
| Number of tapes required for barrier disruption: Day 28 | 38.37 (n=13)              | 55.37 (n=13) | 1.44        | (1.17, 1.78)    | (1.14, 1.82)         | (1.11, 1.88)    | (1.07, 1.95)    | (1.00, 2.08)    |  |

\*Adjusted for baseline value if applicable, age, sex, and baseline HbA1c.

**Table S10: Sensitivity analysis of primary and secondary efficacy outcomes using last observation carried forward in the full analysis set**

For TEWL, integrity, wound depth and diameter, linear regression was used to estimate CIs around differences between the groups. TEWL and integrity measurements were log-transformed before analysis; for these variables changes from baseline are expressed as ratios of geometric means at follow-up to baseline and differences are expressed as ratios of geometric means between groups (AZD4017:placebo). For the remaining variables, which did not meet assumptions for linear regression, median regression was used. The comparison was adjusted for each variable's baseline value (this was not available for wound diameter and depth), age, sex and baseline HbA1c. All TEWL readings were adjusted using pre-disruption TEWL at baseline. TEWL was not measured in 1 participant at baseline as a result of an error and data could therefore only be carried forward for 27 participants.

| Variable                                                                 | Estimated median* |              | Difference* | Confidence interval* |                 |                 |                 |                 |
|--------------------------------------------------------------------------|-------------------|--------------|-------------|----------------------|-----------------|-----------------|-----------------|-----------------|
|                                                                          | Placebo           | AZD4017      |             | 75%                  | 80%             | 85%             | 90%             | 95%             |
| 11bHSD1 activity radioassay (percent conversion per 24 hours):<br>Day 28 | 13.41 (n=14)      | 12.69 (n=14) | -0.72       | (-3.71, 2.27)        | (-3.83, 2.39)   | (-4.59, 3.15)   | (-5.13, 3.68)   | (-5.73, 4.29)   |
| 11bHSD1 activity ELISA (percent conversion per 24 hours):<br>Day 28      | 5.76 (n=14)       | 4.36 (n=14)  | -1.39       | (-3.65, 0.87)        | (-3.76, 0.97)   | (-3.86, 1.07)   | (-4.39, 1.60)   | (-4.79, 2.00)   |
| Sudomotor function Left Hand (µS): Day 35                                | 56.92 (n=14)      | 59.57 (n=14) | 2.65        | (-5.65, 10.96)       | (-5.99, 11.29)  | (-6.38, 11.68)  | (-8.80, 14.10)  | (-10.68, 15.98) |
| Sudomotor function Right Hand (µS): Day 35                               | 54.60 (n=14)      | 59.45 (n=14) | 4.85        | (-1.92, 11.62)       | (-3.00, 12.71)  | (-3.35, 13.06)  | (-6.44, 16.14)  | (-8.12, 17.83)  |
| Sudomotor function Hands (µS): Day 35                                    | 55.06 (n=14)      | 57.94 (n=14) | 2.88        | (-3.84, 9.60)        | (-4.12, 9.89)   | (-4.64, 10.40)  | (-8.55, 14.31)  | (-9.79, 15.55)  |
| Sudomotor function Left Foot (µS): Day 35                                | 75.20 (n=14)      | 69.34 (n=14) | -5.86       | (-10.67, -1.06)      | (-10.87, -0.86) | (-11.22, -0.51) | (-11.69, -0.04) | (-19.25, 7.53)  |
| Sudomotor function Right Foot (µS): Day 35                               | 73.12 (n=14)      | 69.90 (n=14) | -3.23       | (-6.96, 0.51)        | (-7.41, 0.95)   | (-8.42, 1.97)   | (-10.27, 3.82)  | (-13.35, 6.89)  |
| Sudomotor function Feet (µS): Day 35                                     | 74.01 (n=14)      | 69.70 (n=14) | -4.31       | (-8.44, -0.18)       | (-8.61, -0.01)  | (-9.63, 1.01)   | (-11.71, 3.10)  | (-15.60, 6.98)  |

|                                                         |                                  |              |                    |                 |                             |                 |                 |                 |  |
|---------------------------------------------------------|----------------------------------|--------------|--------------------|-----------------|-----------------------------|-----------------|-----------------|-----------------|--|
| Sudomotor function Overall ( $\mu$ S): Day 35           | 64.24 (n=14)                     | 63.79 (n=14) | -0.45              | (-4.23, 3.32)   | (-5.09, 4.19)               | (-7.76, 6.86)   | (-8.73, 7.83)   | (-9.40, 8.50)   |  |
| Skin hydration (A.U): Day 35                            | 38.34 (n=14)                     | 43.42 (n=14) | 5.08               | (1.95, 8.21)    | (0.66, 9.50)                | (0.46, 9.70)    | (-1.79, 11.94)  | (-2.86, 13.02)  |  |
| Epidermal thickness ( $\mu$ m): Day 35                  | 63.31 (n=14)                     | 65.43 (n=14) | 2.11               | (-4.24, 8.46)   | (-4.64, 8.87)               | (-5.63, 9.86)   | (-6.09, 10.32)  | (-6.88, 11.11)  |  |
| Cortisol (mcg/24 hours): Day 35                         | 64.34 (n=14)                     | 68.42 (n=14) | 4.08               | (-18.81, 26.97) | (-23.30, 31.47)             | (-26.68, 34.84) | (-28.32, 36.48) | (-37.79, 45.95) |  |
| Urinary [THF+alloTHF]/THE ratio: Day 35                 | 0.99 (n=14)                      | 0.17 (n=14)  | -0.82              | (-0.96, -0.68)  | (-0.96, -0.68)              | (-1.01, -0.63)  | (-1.02, -0.62)  | (-1.04, -0.60)  |  |
|                                                         | <b>Estimated mean*</b>           |              | <b>Difference*</b> |                 | <b>Confidence interval*</b> |                 |                 |                 |  |
|                                                         | Placebo                          | AZD4017      |                    | 75%             | 80%                         | 85%             | 90%             | 95%             |  |
| Wound gap diameter (mm): Day 2                          | 1.51 (n=14)                      | 0.98 (n=14)  | -0.52              | (-0.82, -0.23)  | (-0.85, -0.20)              | (-0.89, -0.15)  | (-0.95, -0.10)  | (-1.04, -0.01)  |  |
| Wound depth (mm): Day 7                                 | 0.60 (n=14)                      | 0.59 (n=14)  | -0.01              | (-0.10, 0.09)   | (-0.11, 0.10)               | (-0.13, 0.11)   | (-0.14, 0.13)   | (-0.17, 0.16)   |  |
| Wound gap diameter (mm): Day 30                         | 1.32 (n=14)                      | 0.66 (n=14)  | -0.66              | (-0.94, -0.37)  | (-0.98, -0.34)              | (-1.02, -0.30)  | (-1.07, -0.24)  | (-1.16, -0.16)  |  |
| Wound depth (mm): Day 35                                | 0.59 (n=14)                      | 0.56 (n=14)  | -0.03              | (-0.11, 0.05)   | (-0.12, 0.06)               | (-0.13, 0.07)   | (-0.15, 0.09)   | (-0.17, 0.11)   |  |
|                                                         | <b>Estimated geometric mean*</b> |              | <b>Ratio*</b>      |                 | <b>Confidence interval*</b> |                 |                 |                 |  |
|                                                         | Placebo                          | AZD4017      |                    | 75%             | 80%                         | 85%             | 90%             | 95%             |  |
| Hour 3 TEWL (Set 1; Day 0)                              | 34.85 (n=14)                     | 29.97 (n=13) | 0.86               | (0.75, 0.98)    | (0.74, 1.00)                | (0.73, 1.02)    | (0.71, 1.04)    | (0.68, 1.08)    |  |
| Hour 48 TEWL (Set 1; Day 2)                             | 20.37 (n=14)                     | 21.11 (n=13) | 1.04               | (0.89, 1.21)    | (0.87, 1.23)                | (0.85, 1.26)    | (0.83, 1.30)    | (0.79, 1.36)    |  |
| Hour 168 TEWL (Set 1; Day 7)                            | 14.59 (n=14)                     | 15.22 (n=13) | 1.04               | (0.81, 1.35)    | (0.78, 1.39)                | (0.75, 1.44)    | (0.72, 1.52)    | (0.66, 1.64)    |  |
| Hour 3 TEWL (Set 2; Day 28)                             | 21.70 (n=14)                     | 29.62 (n=13) | 1.36               | (1.08, 1.73)    | (1.05, 1.78)                | (1.01, 1.84)    | (0.97, 1.93)    | (0.90, 2.07)    |  |
| Hour 48 TEWL (Set 2; Day 30)                            | 13.87 (n=14)                     | 18.00 (n=13) | 1.30               | (1.05, 1.60)    | (1.03, 1.64)                | (1.00, 1.69)    | (0.96, 1.76)    | (0.90, 1.88)    |  |
| Hour 168 TEWL (Set 2; Day 35)                           | 9.92 (n=14)                      | 11.87 (n=13) | 1.20               | (0.95, 1.51)    | (0.92, 1.56)                | (0.89, 1.61)    | (0.85, 1.68)    | (0.79, 1.81)    |  |
| Hour 0 TEWL (Set 3; Day 35)                             | 6.88 (n=14)                      | 9.67 (n=13)  | 1.41               | (1.12, 1.77)    | (1.09, 1.81)                | (1.05, 1.88)    | (1.01, 1.96)    | (0.94, 2.10)    |  |
| Number of tapes required for barrier disruption: Day 28 | 39.36 (n=14)                     | 55.58 (n=13) | 1.41               | (1.15, 1.73)    | (1.13, 1.77)                | (1.09, 1.82)    | (1.05, 1.90)    | (0.99, 2.02)    |  |

\*Adjusted for baseline value, if applicable, for age, sex, and baseline HbA1c.

**Table S11: Correlations between AZD4017 compliance and efficacy outcomes in the full analysis set (AZD4017 group only)**

Absolute rho values of at least 0.3 were considered preliminary evidence of an association. The sensitivity analysis excluded baseline radioimmunoassay samples that failed QC, an outlying ELISA assay result at day 28, TEWL readings recorded on very hot days, and results that were recorded 1 day earlier than planned, before imputation. Not all of these issues occurred in samples from the AZD4017 group, but issues that did occur could have affected imputed values for any incomplete variables.

| Variable                                                              | All values |                | Excluding outliers/QC failures |                |
|-----------------------------------------------------------------------|------------|----------------|--------------------------------|----------------|
|                                                                       | Imputed    | Available case | Imputed                        | Available case |
| 11bHSD1 activity radioassay (percent conversion per 24 hours): Day 28 | -0.04 (14) | -0.04 (14)     | -0.04 (14)                     | -0.04 (14)     |
| 11bHSD1 activity ELISA (percent conversion per 24 hours): Day 28      | -0.74 (14) | -0.74 (14)     | -0.74 (14)                     | -0.74 (14)     |
| Sudomotor function Left Hand ( $\mu$ S): Day 35                       | -0.05 (14) | -0.08 (13)     | -0.03 (14)                     | -0.08 (13)     |
| Sudomotor function Right Hand ( $\mu$ S): Day 35                      | -0.16 (14) | -0.23 (13)     | -0.16 (14)                     | -0.23 (13)     |
| Sudomotor function Hands ( $\mu$ S): Day 35                           | -0.03 (14) | -0.07 (13)     | -0.03 (14)                     | -0.07 (13)     |
| Sudomotor function Left Foot ( $\mu$ S): Day 35                       | -0.21 (14) | -0.20 (13)     | -0.19 (14)                     | -0.20 (13)     |
| Sudomotor function Right Foot ( $\mu$ S): Day 35                      | 0.06 (14)  | 0.12 (13)      | 0.09 (14)                      | 0.12 (13)      |
| Sudomotor function Feet ( $\mu$ S): Day 35                            | -0.18 (14) | -0.17 (13)     | -0.15 (14)                     | -0.17 (13)     |
| Sudomotor function Overall ( $\mu$ S): Day 35                         | 0.03 (14)  | 0.05 (13)      | 0.05 (14)                      | 0.05 (13)      |
| Skin hydration (A.U): Day 35                                          | 0.55 (14)  | 0.77 (12)      | 0.62 (14)                      | 0.77 (12)      |
| Epidermal thickness ( $\mu$ m): Day 35                                | -0.11 (14) | -0.15 (12)     | -0.11 (14)                     | -0.15 (12)     |
| Cortisol (mcg/24 hours): Day 35                                       | -0.30 (14) | -0.31 (13)     | -0.31 (14)                     | -0.31 (13)     |
| Urinary [THF+alloTHF]/THE ratio: Day 35                               | -0.28 (14) | -0.34 (13)     | -0.26 (14)                     | -0.34 (13)     |
| Wound gap diameter (mm): Day 2                                        | 0.35 (14)  | 0.35 (14)      | 0.35 (14)                      | 0.35 (14)      |

| Variable                                                | All values |                | Excluding outliers/QC failures |                |
|---------------------------------------------------------|------------|----------------|--------------------------------|----------------|
|                                                         | Imputed    | Available case | Imputed                        | Available case |
| Wound depth (mm): Day 7                                 | 0.23 (14)  | 0.23 (14)      | 0.27 (14)                      | 0.31 (13)      |
| Wound gap diameter (mm): Day 30                         | -0.06 (14) | -0.01 (12)     | -0.07 (14)                     | -0.01 (12)     |
| Wound depth (mm): Day 35                                | 0.09 (14)  | 0.10 (12)      | 0.09 (14)                      | 0.10 (12)      |
| Hour 0 TEWL (Set 1; Day 0)                              | -0.42 (14) | -0.43 (13)     | -0.43 (14)                     | -0.43 (13)     |
| Hour 3 TEWL (Set 1; Day 0)                              | -0.35 (14) | -0.39 (12)     | -0.34 (14)                     | -0.39 (12)     |
| Hour 48 TEWL (Set 1; Day 2)                             | -0.20 (14) | -0.13 (11)     | -0.25 (14)                     | -0.17 (8)      |
| Hour 168 TEWL (Set 1; Day 7)                            | -0.07 (14) | -0.01 (13)     | 0.18 (14)                      | 0.38 (9)       |
| Hour 0 TEWL (Set 2; Day 28)                             | -0.33 (14) | -0.33 (14)     | -0.33 (14)                     | -0.33 (14)     |
| Hour 3 TEWL (Set 2; Day 28)                             | -0.37 (14) | -0.37 (14)     | -0.37 (14)                     | -0.37 (14)     |
| Hour 48 TEWL (Set 2; Day 30)                            | 0.29 (14)  | 0.29 (14)      | 0.29 (14)                      | 0.29 (14)      |
| Hour 168 TEWL (Set 2; Day 35)                           | 0.37 (14)  | 0.38 (12)      | 0.34 (14)                      | 0.38 (12)      |
| Hour 0 TEWL (Set 3; Day 35)                             | 0.30 (14)  | 0.39 (12)      | 0.31 (14)                      | 0.39 (12)      |
| Number of tapes required for barrier disruption: Day 28 | -0.15 (14) | -0.15 (14)     | -0.15 (14)                     | -0.15 (14)     |

All values presented as Spearman's rho (number of participants included).

**Table S12: Unadjusted differences in final values of longitudinal laboratory safety variables in the safety set**

Multiple imputation was used to address missing data; results are presented for placebo n=14, AZD4017 n=14. All point estimates and CIs were estimated using linear regression. For each visit, the values presented are: mean placebo group, mean AZD4017 group; difference AZD4017-placebo (90% CI).

| Variable                                   | Day 7                                | Day 28                                | Day 35                                 | Day 42                                |
|--------------------------------------------|--------------------------------------|---------------------------------------|----------------------------------------|---------------------------------------|
| Body mass index (kg/m <sup>2</sup> )       | N/A                                  | N/A                                   | 33.90, 35.55; 1.65 (-5.35, 8.65)       | N/A                                   |
| Waist-hip ratio                            | N/A                                  | N/A                                   | 0.98, 1.02; 0.04 (-0.01, 0.09)         | N/A                                   |
| Systolic blood pressure (mm Hg)            | N/A                                  | N/A                                   | 143.66, 129.01; -14.64 (-22.83, -6.45) | 136.56, 137.50; 0.94 (-7.02, 8.89)    |
| Diastolic blood pressure (mm Hg)           | N/A                                  | N/A                                   | 79.95, 73.64; -6.31 (-11.24, -1.39)    | 80.11, 79.29; -0.83 (-8.02, 6.37)     |
| HbA1c (mmol/mol)                           | 71.88, 65.81; -6.07 (-17.14, 5.00)   | 70.14, 66.00; -4.14 (-14.73, 6.45)    | 70.64, 64.79; -5.85 (-17.14, 5.44)     | 69.37, 65.43; -3.94 (-14.93, 7.05)    |
| High-density lipoprotein (mmol/l)          | 1.16, 1.05; -0.11 (-0.28, 0.07)      | 1.22, 1.11; -0.11 (-0.28, 0.07)       | 1.18, 1.01; -0.17 (-0.34, 0.00)        | 1.19, 1.21; 0.02 (-0.18, 0.22)        |
| Cholesterol (mmol/l)                       | 4.31, 3.59; -0.71 (-1.26, -0.17)     | 4.21, 3.54; -0.67 (-1.17, -0.16)      | 4.11, 3.44; -0.68 (-1.18, -0.17)       | 4.06, 3.84; -0.22 (-0.77, 0.33)       |
| Triglycerides (mmol/l)                     | 2.11, 2.39; 0.28 (-0.51, 1.07)       | 1.81, 1.71; -0.11 (-0.63, 0.42)       | 2.22, 2.37; 0.15 (-0.91, 1.21)         | 1.61, 1.94; 0.33 (-0.39, 1.06)        |
| Hemoglobin (g/l)                           | 136.07, 137.43; 1.36 (-6.38, 9.09)   | 138.46, 138.36; -0.10 (-6.97, 6.77)   | 134.84, 136.30; 1.46 (-6.54, 9.46)     | 136.56, 139.86; 3.29 (-5.51, 12.09)   |
| White blood cells (x10 <sup>9</sup> /l)    | 6.71, 7.96; 1.26 (-0.02, 2.54)       | 6.52, 6.72; 0.20 (-0.97, 1.38)        | 6.68, 6.93; 0.25 (-1.00, 1.50)         | 6.55, 7.66; 1.12 (-0.23, 2.46)        |
| Platelets (x10 <sup>9</sup> /l)            | 219.36, 275.29; 55.93 (8.28, 103.58) | 219.37, 288.57; 69.20 (15.99, 122.41) | 213.32, 265.82; 52.50 (2.98, 102.03)   | 220.63, 281.43; 60.80 (10.77, 110.82) |
| Red blood cells (x10 <sup>12</sup> /l)     | 4.74, 4.59; -0.16 (-0.48, 0.16)      | 4.81, 4.68; -0.13 (-0.41, 0.16)       | 4.67, 4.57; -0.10 (-0.39, 0.19)        | 4.73, 4.77; 0.04 (-0.29, 0.38)        |
| Mean corpuscular volume (fl)               | 89.71, 92.14; 2.43 (-1.26, 6.12)     | 88.30, 91.21; 2.92 (-1.05, 6.88)      | 90.23, 92.20; 1.96 (-2.13, 6.06)       | 88.19, 90.50; 2.31 (-1.16, 5.78)      |
| Hematocrit (packed cell volume)            | 0.43, 0.42; -0.01 (-0.03, 0.02)      | 0.42, 0.43; 0.00 (-0.02, 0.03)        | 0.42, 0.42; 0.00 (-0.03, 0.03)         | 0.42, 0.43; 0.02 (-0.01, 0.04)        |
| Mean corpuscular hemoglobin (pg)           | 28.79, 30.13; 1.34 (-0.12, 2.80)     | 28.96, 29.68; 0.72 (-0.61, 2.05)      | 28.97, 29.99; 1.02 (-0.44, 2.48)       | 29.01, 29.42; 0.41 (-1.02, 1.85)      |
| Corpuscular hemoglobin concentration (g/l) | 321.07, 326.93; 5.86 (-0.96, 12.68)  | 328.44, 325.79; -2.66 (-9.90, 4.59)   | 321.93, 325.20; 3.27 (-3.47, 10.01)    | 328.81, 324.86; -3.95 (-11.54, 3.64)  |
| Red blood cell distribution width (%)      | 14.43, 14.27; -0.16 (-0.94, 0.62)    | 13.98, 14.08; 0.10 (-0.45, 0.65)      | 14.21, 14.42; 0.21 (-0.38, 0.81)       | 13.76, 13.74; -0.02 (-0.68, 0.64)     |

| Variable                                 | Day 7                               | Day 28                              | Day 35                              | Day 42                              |
|------------------------------------------|-------------------------------------|-------------------------------------|-------------------------------------|-------------------------------------|
| Albumin (g/l)                            | 39.50, 40.14; 0.64 (-1.23, 2.52)    | 38.94, 38.71; -0.22 (-1.95, 1.51)   | 39.88, 40.04; 0.16 (-1.65, 1.98)    | 38.29, 38.84; 0.56 (-0.80, 1.91)    |
| Bilirubin (umol/l)                       | 8.36, 8.64; 0.29 (-2.43, 3.00)      | 9.81, 9.86; 0.05 (-2.50, 2.60)      | 8.80, 8.36; -0.44 (-3.41, 2.53)     | 8.29, 8.40; 0.11 (-1.54, 1.75)      |
| Alkaline phosphatase (U/l)               | 80.86, 80.14; -0.71 (-17.98, 16.56) | 78.01, 68.93; -9.08 (-23.40, 5.24)  | 77.67, 68.18; -9.50 (-23.41, 4.41)  | 78.30, 76.94; -1.36 (-19.31, 16.60) |
| Alanine aminotransferase (iu/l)          | 22.93, 26.14; 3.21 (-2.22, 8.64)    | 23.19, 23.07; -0.12 (-5.46, 5.22)   | 22.81, 22.19; -0.61 (-6.76, 5.53)   | 21.74, 23.96; 2.23 (-3.55, 8.00)    |
| Aspartate aminotransferase (iu/l)        | 21.07, 22.36; 1.29 (-1.98, 4.55)    | 20.63, 21.36; 0.73 (-1.56, 3.01)    | 20.76, 20.92; 0.16 (-2.17, 2.49)    | 19.15, 21.80; 2.65 (-0.73, 6.03)    |
| Gamma-glutamyl transpeptidase (iu/l)     | 39.71, 37.71; -2.00 (-22.51, 18.51) | 42.23, 29.86; -12.37 (-29.42, 4.68) | 43.29, 28.10; -15.19 (-35.42, 5.05) | 40.96, 28.82; -12.14 (-29.49, 5.21) |
| eGFR (ml/min/1.73m <sup>2</sup> )        | 77.50, 71.50; -6.00 (-14.97, 2.97)  | 80.49, 75.14; -5.34 (-13.52, 2.83)  | 76.61, 73.60; -3.02 (-13.42, 7.39)  | 78.28, 76.21; -2.06 (-10.63, 6.51)  |
| Sodium (mmol/l)                          | 139.29, 140.00; 0.71 (-0.83, 2.26)  | 138.12, 138.79; 0.66 (-0.62, 1.95)  | 140.05, 139.28; -0.78 (-2.63, 1.08) | 138.86, 138.00; -0.86 (-2.24, 0.52) |
| Potassium (mmol/l)                       | 4.79, 4.59; -0.20 (-0.50, 0.10)     | 4.50, 4.74; 0.24 (0.00, 0.49)       | 4.47, 4.52; 0.05 (-0.18, 0.28)      | 4.63, 4.63; -0.00 (-0.26, 0.26)     |
| Urea (mmol/l)                            | 6.91, 7.24; 0.33 (-1.18, 1.84)      | 6.71, 6.56; -0.15 (-2.04, 1.74)     | 7.68, 7.49; -0.20 (-2.70, 2.31)     | 7.04, 7.57; 0.53 (-1.33, 2.38)      |
| Creatinine (umol/l)                      | 82.36, 88.57; 6.21 (-6.95, 19.38)   | 77.83, 80.93; 3.10 (-8.58, 14.77)   | 84.69, 84.94; 0.25 (-14.58, 15.08)  | 81.18, 79.93; -1.25 (-12.61, 10.11) |
| Testosterone (nmol/l)                    | 10.34, 6.43; -3.91 (-8.01, 0.18)    | 11.08, 6.46; -4.62 (-8.48, -0.75)   | 10.26, 6.46; -3.80 (-7.92, 0.31)    | 10.25, 7.66; -2.59 (-6.72, 1.53)    |
| Dehydroepiandrosterone sulphate (umol/l) | 3.56, 4.91; 1.36 (-0.58, 3.30)      | 3.25, 5.35; 2.10 (0.53, 3.66)       | 3.51, 4.91; 1.39 (-0.31, 3.10)      | 3.00, 3.55; 0.55 (-0.75, 1.85)      |
| Free thyroxine (pmol/l)                  | 14.63, 15.75; 1.12 (-0.28, 2.52)    | 14.64, 15.74; 1.10 (-0.05, 2.26)    | 14.39, 15.48; 1.09 (-0.05, 2.23)    | 14.00, 15.10; 1.10 (0.15, 2.06)     |
| Thyroid-stimulating hormone (mIU/l)      | 1.68, 1.84; 0.16 (-0.27, 0.59)      | 1.89, 1.71; -0.18 (-0.71, 0.35)     | 1.77, 1.68; -0.09 (-0.54, 0.35)     | 1.79, 1.76; -0.03 (-0.57, 0.51)     |

**Table S13: Unadjusted differences in changes from baseline in longitudinal laboratory safety variables in the safety set**

Multiple imputation was used to address missing data; results are presented for placebo n=14, AZD4017 n=14. All point estimates and CIs were estimated using linear regression. For each visit, the values presented are: mean placebo group, mean AZD4017 group; difference AZD4017-placebo (90% CI).

| Variable                                   | Day 7                              | Day 28                            | Day 35                               | Day 42                            |
|--------------------------------------------|------------------------------------|-----------------------------------|--------------------------------------|-----------------------------------|
| Body mass index (kg/m <sup>2</sup> )       | N/A                                | N/A                               | 0.23, 0.51; 0.28 (-0.64, 1.19)       | N/A                               |
| Waist-hip ratio                            | N/A                                | N/A                               | -0.00, -0.00; -0.00 (-0.03, 0.03)    | N/A                               |
| Systolic blood pressure (mm Hg)            | N/A                                | N/A                               | 7.94, -11.41; -19.36 (-31.07, -7.64) | 0.85, -2.93; -3.78 (-13.95, 6.39) |
| Diastolic blood pressure (mm Hg)           | N/A                                | N/A                               | -3.90, 1.00; 4.90 (-1.16, 10.96)     | -3.75, 6.64; 10.39 (2.27, 18.51)  |
| HbA1c (mmol/mol)                           | -0.40, -0.19; 0.22 (-1.26, 1.69)   | -2.15, 0.00; 2.15 (-0.89, 5.18)   | -1.64, -1.21; 0.44 (-3.99, 4.86)     | -2.92, -0.57; 2.35 (-2.59, 7.28)  |
| High density lipoprotein (mmol/l)          | -0.08, -0.14; -0.06 (-0.15, 0.02)  | -0.01, -0.08; -0.07 (-0.14, 0.01) | -0.06, -0.19; -0.13 (-0.21, -0.05)   | -0.04, 0.02; 0.06 (-0.04, 0.17)   |
| Cholesterol (mmol/l)                       | -0.05, -0.36; -0.31 (-0.51, -0.10) | -0.15, -0.41; -0.26 (-0.66, 0.14) | -0.24, -0.51; -0.27 (-0.70, 0.17)    | -0.29, -0.11; 0.19 (-0.34, 0.71)  |
| Triglycerides (mmol/l)                     | 0.44, 0.37; -0.06 (-0.54, 0.41)    | 0.13, -0.31; -0.45 (-0.85, -0.05) | 0.54, 0.35; -0.19 (-0.89, 0.50)      | -0.07, -0.08; -0.01 (-0.50, 0.48) |
| Hemoglobin (g/l)                           | -3.14, -2.00; 1.14 (-2.06, 4.34)   | -0.76, -1.07; -0.31 (-4.32, 3.69) | -4.38, -3.13; 1.24 (-3.57, 6.06)     | -2.65, 0.43; 3.08 (-0.70, 6.86)   |
| White blood cells (x10 <sup>9</sup> /l)    | 0.25, 0.63; 0.37 (-0.33, 1.08)     | 0.06, -0.62; -0.68 (-1.27, -0.09) | 0.22, -0.41; -0.63 (-1.40, 0.13)     | 0.09, 0.33; 0.23 (-0.58, 1.05)    |
| Platelets (x10 <sup>9</sup> /l)            | 0.64, 2.14; 1.50 (-12.40, 15.40)   | 0.66, 15.43; 14.77 (-6.85, 36.40) | -5.40, -7.32; -1.93 (-23.02, 19.17)  | 1.92, 8.29; 6.37 (-10.84, 23.58)  |
| Red blood cells (x10 <sup>12</sup> /l)     | -0.10, -0.13; -0.03 (-0.13, 0.07)  | -0.03, -0.03; 0.00 (-0.11, 0.11)  | -0.17, -0.14; 0.03 (-0.11, 0.16)     | -0.11, 0.06; 0.17 (0.06, 0.29)    |
| Mean corpuscular volume (fl)               | 1.29, 0.93; -0.36 (-2.12, 1.41)    | -0.13, 0.00; 0.13 (-1.68, 1.94)   | 1.80, 0.98; -0.82 (-2.99, 1.35)      | -0.24, -0.71; -0.48 (-2.01, 1.06) |
| Hematocrit (packed cell volume)            | -0.00, -0.01; -0.01 (-0.02, 0.01)  | -0.01, -0.00; 0.01 (-0.01, 0.02)  | -0.01, -0.01; 0.00 (-0.01, 0.02)     | -0.01, 0.01; 0.02 (0.00, 0.03)    |
| Mean corpuscular hemoglobin (pg)           | -0.03, 0.39; 0.42 (0.07, 0.78)     | 0.14, -0.06; -0.19 (-0.59, 0.20)  | 0.15, 0.25; 0.10 (-0.38, 0.59)       | 0.19, -0.31; -0.50 (-0.99, -0.01) |
| Corpuscular hemoglobin concentration (g/l) | -4.50, 0.29; 4.79 (-1.61, 11.19)   | 2.87, -0.86; -3.73 (-10.81, 3.35) | -3.64, -1.44; 2.20 (-5.76, 10.16)    | 3.24, -1.79; -5.03 (-11.66, 1.61) |
| Red blood cell distribution width (%)      | 0.55, 0.15; -0.40 (-0.89, 0.09)    | 0.10, -0.04; -0.14 (-0.62, 0.34)  | 0.33, 0.30; -0.03 (-0.46, 0.40)      | -0.12, -0.38; -0.26 (-0.73, 0.21) |



| Variable                                 | Day 7                             | Day 28                                | Day 35                                | Day 42                               |
|------------------------------------------|-----------------------------------|---------------------------------------|---------------------------------------|--------------------------------------|
| Albumin (g/l)                            | 0.07, 0.64; 0.57 (-0.61, 1.75)    | -0.49, -0.79; -0.29 (-1.70, 1.12)     | 0.45, 0.54; 0.09 (-1.45, 1.63)        | -1.14, -0.66; 0.49 (-0.62, 1.59)     |
| Bilirubin (umol/l)                       | -0.57, 0.50; 1.07 (-0.75, 2.90)   | 0.88, 1.71; 0.83 (-0.69, 2.35)        | -0.13, 0.21; 0.35 (-2.19, 2.88)       | -0.64, 0.26; 0.89 (-0.85, 2.64)      |
| Alkaline phosphatase (U/l)               | 0.43, -4.93; -5.36 (-11.92, 1.20) | -2.42, -16.14; -13.72 (-22.00, -5.44) | -2.75, -16.89; -14.14 (-21.88, -6.39) | -2.13, -8.13; -6.00 (-16.68, 4.68)   |
| Alanine aminotransferase (iu/l)          | -1.71, -1.29; 0.43 (-2.53, 3.38)  | -1.45, -4.36; -2.90 (-6.02, 0.21)     | -1.84, -5.24; -3.40 (-8.09, 1.29)     | -2.91, -3.47; -0.56 (-4.51, 3.39)    |
| Aspartate aminotransferase (iu/l)        | 0.07, -0.29; -0.36 (-3.22, 2.51)  | -0.37, -1.29; -0.92 (-3.59, 1.75)     | -0.24, -1.73; -1.48 (-4.90, 1.94)     | -1.85, -0.85; 1.01 (-2.75, 4.76)     |
| Gamma-glutamyl transpeptidase (iu/l)     | -2.14, -1.57; 0.57 (-2.73, 3.87)  | 0.37, -9.43; -9.80 (-17.09, -2.51)    | 1.43, -11.18; -12.61 (-25.48, 0.26)   | -0.90, -10.47; -9.57 (-17.50, -1.64) |
| eGFR (ml/min/1.73m <sup>2</sup> )        | -4.36, -7.71; -3.36 (-7.87, 1.15) | -1.37, -4.07; -2.70 (-5.83, 0.43)     | -5.24, -5.62; -0.38 (-5.36, 4.61)     | -3.58, -3.00; 0.58 (-3.91, 5.08)     |
| Sodium (mmol/l)                          | 0.36, -0.71; -1.07 (-3.83, 1.69)  | -0.81, -1.93; -1.12 (-3.94, 1.70)     | 1.13, -1.44; -2.56 (-5.46, 0.33)      | -0.07, -2.71; -2.65 (-5.44, 0.15)    |
| Potassium (mmol/l)                       | 0.33, -0.04; -0.36 (-0.62, -0.11) | 0.03, 0.11; 0.08 (-0.16, 0.32)        | 0.01, -0.11; -0.11 (-0.37, 0.14)      | 0.17, 0.01; -0.16 (-0.43, 0.10)      |
| Urea (mmol/l)                            | -0.04, -0.01; 0.04 (-0.87, 0.94)  | -0.25, -0.69; -0.45 (-1.34, 0.45)     | 0.72, 0.24; -0.49 (-1.84, 0.87)       | 0.09, 0.32; 0.23 (-0.82, 1.29)       |
| Creatinine (umol/l)                      | 5.71, 12.36; 6.64 (0.17, 13.12)   | 1.19, 4.71; 3.53 (-0.64, 7.69)        | 8.05, 8.72; 0.68 (-6.83, 8.18)        | 4.54, 3.71; -0.82 (-7.40, 5.75)      |
| Testosterone (nmol/l)                    | -0.76, -0.54; 0.21 (-1.52, 1.94)  | -0.02, -0.51; -0.49 (-1.83, 0.86)     | -0.84, -0.51; 0.33 (-1.61, 2.26)      | -0.85, 0.69; 1.53 (-0.41, 3.48)      |
| Dehydroepiandrosterone sulphate (umol/l) | 0.03, 2.00; 1.97 (1.04, 2.91)     | -0.28, 2.44; 2.71 (1.98, 3.44)        | -0.02, 1.99; 2.01 (1.14, 2.88)        | -0.53, 0.64; 1.16 (0.51, 1.82)       |
| Free thyroxine (pmol/l)                  | -0.24, 0.02; 0.26 (-0.89, 1.40)   | -0.22, 0.01; 0.24 (-0.76, 1.23)       | -0.47, -0.24; 0.23 (-0.94, 1.39)      | -0.87, -0.63; 0.24 (-0.67, 1.15)     |
| Thyroid-stimulating hormone (mIU/l)      | -0.06, 0.12; 0.18 (-0.17, 0.52)   | 0.15, -0.01; -0.16 (-0.51, 0.18)      | 0.03, -0.05; -0.08 (-0.48, 0.33)      | 0.05, 0.04; -0.01 (-0.40, 0.37)      |

\*Estimated in imputed data.

**Table S14: Adjusted differences in changes from baseline in longitudinal laboratory safety variables in the safety set**

Multiple imputation was used to address missing data; results are presented for placebo n=14, AZD4017 n=14. All point estimates and CIs were estimated using linear regression, adjusted for the variable's baseline value, age, sex, and baseline HbA1c. For each visit, the values presented are: mean placebo group, mean AZD4017 group; difference AZD4017-placebo (90% CI).

| Variable                                   | Day 7                             | Day 28                               | Day 35                              | Day 42                             |
|--------------------------------------------|-----------------------------------|--------------------------------------|-------------------------------------|------------------------------------|
| Body mass index (kg/m <sup>2</sup> )       | N/A                               | N/A                                  | 0.17, 0.58; 0.41 (-0.51, 1.34)      | N/A                                |
| Waist-hip ratio                            | N/A                               | N/A                                  | -0.01, 0.01; 0.02 (-0.01, 0.05)     | N/A                                |
| Systolic blood pressure (mm Hg)            | N/A                               | N/A                                  | 5.61, -9.13; -14.74 (-23.00, -6.47) | 89.67, 90.44; 0.77 (-6.58, 8.11)   |
| Diastolic blood pressure (mm Hg)           | N/A                               | N/A                                  | -0.25, -2.69; -2.43 (-7.67, 2.80)   | 58.31, 60.40; 2.09 (-6.77, 10.95)  |
| HbA1c (mmol/mol)                           | -0.38, -0.19; 0.18 (-1.51, 1.88)  | -2.10, 0.08; 2.17 (-0.64, 4.99)      | -1.71, -0.99; 0.72 (-3.64, 5.09)    | -2.87, -0.45; 2.42 (-2.38, 7.22)   |
| High-density lipoprotein (mmol/l)          | -0.08, -0.14; -0.06 (-0.14, 0.02) | 0.18, 0.10; -0.08 (-0.16, 0.00)      | 0.10, -0.03; -0.13 (-0.21, -0.05)   | 0.06, 0.11; 0.05 (-0.07, 0.16)     |
| Cholesterol (mmol/l)                       | 0.00, -0.41; -0.42 (-0.60, -0.23) | 1.55, 1.10; -0.46 (-0.79, -0.12)     | 0.97, 0.46; -0.51 (-0.87, -0.15)    | 1.28, 1.18; -0.10 (-0.54, 0.34)    |
| Triglycerides (mmol/l)                     | 0.47, 0.33; -0.14 (-0.67, 0.40)   | 0.62, 0.43; -0.19 (-0.56, 0.18)      | -0.03, -0.52; -0.48 (-1.21, 0.24)   | 0.05, 0.07; 0.02 (-0.51, 0.55)     |
| Hemoglobin (g/l)                           | -2.90, -2.24; 0.67 (-2.12, 3.45)  | 45.08, 44.10; -0.98 (-4.13, 2.17)    | 15.89, 16.53; 0.64 (-3.96, 5.24)    | -3.55, -1.48; 2.07 (-1.62, 5.76)   |
| White blood cells (x10 <sup>9</sup> /l)    | 0.17, 0.71; 0.54 (-0.14, 1.22)    | 1.76, 1.36; -0.40 (-0.87, 0.08)      | 1.51, 1.21; -0.31 (-0.96, 0.34)     | 1.07, 1.40; 0.33 (-0.41, 1.07)     |
| Platelets (x10 <sup>9</sup> /l)            | 0.10, 2.52; 2.42 (-13.65, 18.50)  | 7.72, 21.04; 13.32 (-9.56, 36.20)    | 9.47, 8.55; -0.91 (-25.20, 23.37)   | 2.42, 3.89; 1.47 (-16.74, 19.68)   |
| Red blood cells (x10 <sup>12</sup> /l)     | -0.09, -0.14; -0.05 (-0.17, 0.06) | 0.93, 0.88; -0.05 (-0.15, 0.04)      | 0.42, 0.40; -0.02 (-0.15, 0.12)     | -0.29, -0.15; 0.15 (0.03, 0.26)    |
| Mean corpuscular volume (fl)               | 1.06, 1.17; 0.11 (-1.83, 2.05)    | 6.03, 6.55; 0.52 (-1.49, 2.53)       | 9.58, 9.41; -0.17 (-2.53, 2.19)     | 12.90, 13.06; 0.16 (-1.42, 1.73)   |
| Hematocrit (packed cell volume)            | -0.00, -0.01; -0.01 (-0.02, 0.01) | 0.12, 0.12; 0.00 (-0.01, 0.02)       | 0.03, 0.03; 0.00 (-0.02, 0.02)      | -0.02, -0.01; 0.02 (0.00, 0.03)    |
| Mean corpuscular hemoglobin (pg)           | -0.02, 0.39; 0.41 (0.08, 0.75)    | 3.58, 3.51; -0.07 (-0.44, 0.31)      | 1.34, 1.51; 0.17 (-0.28, 0.62)      | 2.42, 2.00; -0.42 (-0.95, 0.10)    |
| Corpuscular hemoglobin concentration (g/l) | -4.52, 0.39; 4.91 (-1.41, 11.22)  | 150.85, 147.06; -3.80 (-10.80, 3.21) | 121.63, 123.38; 1.75 (-4.85, 8.35)  | 62.90, 57.67; -5.22 (-12.18, 1.74) |
| Red blood cell distribution width (%)      | 0.52, 0.17; -0.36 (-0.89, 0.18)   | 6.04, 5.95; -0.09 (-0.49, 0.31)      | 2.59, 2.70; 0.11 (-0.28, 0.51)      | 2.84, 2.64; -0.21 (-0.68, 0.26)    |

| Variable                                 | Day 7                             | Day 28                               | Day 35                               | Day 42                               |
|------------------------------------------|-----------------------------------|--------------------------------------|--------------------------------------|--------------------------------------|
| Albumin (g/l)                            | 0.18, 0.54; 0.37 (-0.82, 1.55)    | 10.87, 10.50; -0.37 (-1.82, 1.09)    | 9.36, 9.35; -0.01 (-1.60, 1.59)      | 11.80, 12.19; 0.40 (-0.59, 1.38)     |
| Bilirubin (umol/l)                       | -0.50, 0.43; 0.93 (-1.14, 3.00)   | 1.36, 1.97; 0.60 (-0.89, 2.09)       | 4.14, 3.50; -0.64 (-3.01, 1.73)      | 2.16, 2.50; 0.35 (-1.17, 1.87)       |
| Alkaline phosphatase (U/l)               | 0.66, -5.34; -6.00 (-12.44, 0.44) | 18.33, 5.94; -12.39 (-20.21, -4.56)  | 12.99, -0.10; -13.09 (-20.43, -5.75) | 8.43, 2.78; -5.65 (-15.25, 3.95)     |
| Alanine aminotransferase (iu/l)          | -2.09, -0.94; 1.16 (-1.84, 4.15)  | 4.23, 2.27; -1.96 (-4.94, 1.03)      | 5.83, 4.19; -1.64 (-5.88, 2.61)      | 1.56, 2.34; 0.78 (-3.00, 4.56)       |
| Aspartate aminotransferase (iu/l)        | -0.33, 0.13; 0.46 (-2.29, 3.21)   | 11.62, 11.74; 0.12 (-1.81, 2.05)     | 6.93, 6.90; -0.04 (-2.52, 2.45)      | 6.53, 8.74; 2.21 (-1.02, 5.44)       |
| Gamma-glutamyl transpeptidase (iu/l)     | -2.23, -1.47; 0.76 (-2.83, 4.35)  | 10.09, -0.19; -10.28 (-14.96, -5.60) | 7.96, -4.02; -11.97 (-22.80, -1.15)  | 6.46, -3.09; -9.55 (-14.88, -4.22)   |
| eGFR (ml/min/1.73m <sup>2</sup> )        | -4.42, -7.60; -3.18 (-8.30, 1.94) | 2.79, 0.60; -2.19 (-5.38, 1.01)      | -14.06, -13.79; 0.27 (-4.57, 5.10)   | 4.24, 5.86; 1.62 (-2.77, 6.01)       |
| Sodium (mmol/l)                          | -0.23, -0.12; 0.10 (-1.23, 1.44)  | 138.48, 138.64; 0.16 (-0.98, 1.29)   | 1.57, 0.37; -1.19 (-3.21, 0.82)      | 135.61, 134.37; -1.25 (-2.42, -0.07) |
| Potassium (mmol/l)                       | 0.30, -0.00; -0.31 (-0.58, -0.03) | 2.17, 2.35; 0.18 (-0.06, 0.43)       | 1.61, 1.63; 0.01 (-0.22, 0.25)       | 1.85, 1.80; -0.04 (-0.31, 0.22)      |
| Urea (mmol/l)                            | -0.08, 0.04; 0.13 (-0.79, 1.05)   | -0.33, -0.68; -0.35 (-1.31, 0.61)    | -1.47, -1.99; -0.52 (-1.88, 0.83)    | 0.16, 0.18; 0.02 (-1.04, 1.08)       |
| Creatinine (umol/l)                      | 5.30, 12.74; 7.43 (0.79, 14.08)   | -1.29, 2.14; 3.43 (-0.98, 7.85)      | -8.65, -6.87; 1.78 (-5.65, 9.22)     | 9.36, 7.78; -1.58 (-8.24, 5.07)      |
| Testosterone (nmol/l)                    | -0.34, -0.97; -0.63 (-2.52, 1.25) | 0.86, -0.20; -1.06 (-2.58, 0.45)     | 0.38, -0.02; -0.40 (-2.66, 1.85)     | 0.44, 1.57; 1.12 (-1.20, 3.45)       |
| Dehydroepiandrosterone sulphate (umol/l) | -0.13, 2.17; 2.30 (1.52, 3.08)    | -0.50, 2.36; 2.86 (2.09, 3.64)       | -0.15, 2.02; 2.16 (1.29, 3.04)       | 0.32, 1.41; 1.09 (0.43, 1.75)        |
| Free thyroxine (pmol/l)                  | -0.36, 0.14; 0.50 (-0.63, 1.64)   | 5.32, 5.82; 0.51 (-0.43, 1.44)       | 4.33, 4.99; 0.65 (-0.45, 1.76)       | 3.77, 4.56; 0.79 (0.07, 1.52)        |
| Thyroid stimulating hormone (mIU/l)      | -0.02, 0.08; 0.10 (-0.22, 0.42)   | 0.12, -0.07; -0.20 (-0.58, 0.19)     | 0.52, 0.36; -0.15 (-0.54, 0.23)      | 0.09, 0.05; -0.04 (-0.46, 0.38)      |

**Table S15: Absolute and relative frequencies of values below or above normal limits for laboratory safety variables in the safety set**

| Variable                 | LLN | ULN | Summary         | Day 0   |         | Day 7   |         | Day 28  |         | Day 35  |         | Day 42  |         |
|--------------------------|-----|-----|-----------------|---------|---------|---------|---------|---------|---------|---------|---------|---------|---------|
|                          |     |     |                 | Placebo | AZD4017 | Placebo | AZD4017 | Placebo | AZD4017 | Placebo | AZD4017 | Placebo | AZD4017 |
| Body mass index          | N/A | N/A | Total, n        | 14      | 14      |         |         |         |         | 13      | 13      |         |         |
| Waist hip ratio          | N/A | N/A | Total, n        | 14      | 14      |         |         |         |         | 13      | 13      |         |         |
| Systolic blood pressure  | N/A | 150 | Total, n        | 14      | 14      |         |         |         |         | 13      | 13      | 13      | 14      |
|                          |     |     | Above normal, n | 3       | 2       |         |         |         |         | 4       | 1       | 3       |         |
|                          |     |     | Above normal, % | 21      | 14      |         |         |         |         | 31      | 8       | 23      |         |
| Diastolic blood pressure | N/A | 90  | Total, n        | 14      | 14      |         |         |         |         | 13      | 13      | 13      | 14      |
|                          |     |     | Above normal, n | 2       |         |         |         |         |         | 1       | 1       | 2       | 3       |
|                          |     |     | Above normal, % | 14      |         |         |         |         |         | 8       | 8       | 15      | 21      |
| HbA1c                    | N/A | 41  | Total, n        | 14      | 14      | 13      | 13      | 13      | 14      | 11      | 12      | 13      | 14      |
|                          |     |     | Above normal, n | 14      | 14      | 13      | 12      | 13      | 14      | 11      | 12      | 13      | 14      |
|                          |     |     | Above normal, % | 100     | 100     | 100     | 92      | 100     | 100     | 100     | 100     | 100     | 100     |
| High-density lipoprotein | 1.5 | N/A | Total, n        | 14      | 14      | 14      | 14      | 13      | 14      | 12      | 12      | 12      | 13      |
|                          |     |     | Below normal, n | 12      | 12      | 12      | 14      | 11      | 14      | 10      | 12      | 10      | 10      |
|                          |     |     | Below normal, % | 86      | 86      | 86      | 100     | 85      | 100     | 83      | 100     | 83      | 77      |
| Cholesterol              | 2.6 | 5.2 | Total, n        | 14      | 14      | 14      | 14      | 13      | 14      | 12      | 12      | 12      | 13      |
|                          |     |     | Below normal, n |         |         |         |         |         |         |         |         |         | 1       |
|                          |     |     | Below normal, % |         |         |         |         |         |         |         |         |         | 8       |
|                          |     |     | Above normal, n | 2       | 1       | 2       |         | 1       |         | 1       | 1       | 1       |         |
|                          |     |     | Above normal, % | 14      | 7       | 14      |         | 8       |         | 8       | 8       | 8       |         |
| Triglycerides            | N/A | N/A | Total, n        | 14      | 14      | 14      | 14      | 13      | 14      | 12      | 12      | 12      | 13      |

| Variable                | LLN | ULN | Summary         | Day 0   |         | Day 7   |         | Day 28  |         | Day 35  |         | Day 42  |         |    |
|-------------------------|-----|-----|-----------------|---------|---------|---------|---------|---------|---------|---------|---------|---------|---------|----|
|                         |     |     |                 | Placebo | AZD4017 | Placebo | AZD4017 | Placebo | AZD4017 | Placebo | AZD4017 | Placebo | AZD4017 |    |
| Hemoglobin              | 114 | 160 | Total, n        | 14      | 14      | 14      | 14      | 13      | 14      | 12      | 13      | 13      | 14      |    |
|                         |     |     | Below normal, n | 1       |         |         |         | 1       |         | 1       |         | 1       |         |    |
|                         |     |     | Below normal, % | 7       |         |         |         | 8       |         | 8       |         | 8       |         |    |
|                         |     |     | Above normal, n | 1       | 1       | 1       | 1       |         | 1       |         | 1       |         | 1       |    |
|                         |     |     | Above normal, % | 7       | 7       | 7       | 7       |         | 7       |         | 8       |         | 7       |    |
| White blood cells       | 4   | 11  | Total, n        | 14      | 14      | 14      | 14      | 13      | 14      | 12      | 13      | 13      | 14      |    |
|                         |     |     | Below normal, n | 1       | 1       |         | 1       | 1       | 1       | 1       | 1       | 1       | 1       |    |
|                         |     |     | Below normal, % | 7       | 7       |         | 7       | 8       | 7       | 8       | 8       | 8       | 7       |    |
|                         |     |     | Above normal, n | 1       | 1       |         |         |         |         |         |         |         |         | 1  |
|                         |     |     | Above normal, % | 7       | 7       |         |         |         |         |         |         |         |         | 7  |
| Platelets               | 150 | 400 | Total, n        | 14      | 14      | 14      | 14      | 13      | 14      | 12      | 13      | 13      | 14      |    |
|                         |     |     | Below normal, n | 1       | 1       | 2       | 1       | 1       | 1       | 1       | 1       | 1       | 1       |    |
|                         |     |     | Below normal, % | 7       | 7       | 14      | 7       | 8       | 7       | 8       | 8       | 8       | 7       |    |
|                         |     |     | Above normal, n |         | 1       |         | 2       |         | 2       |         | 2       |         | 2       | 2  |
|                         |     |     | Above normal, % |         | 7       |         | 14      |         | 14      |         | 15      |         | 14      | 14 |
| Red blood cells         | 3.8 | 5.8 | Total, n        | 14      | 14      | 14      | 14      | 13      | 14      | 12      | 13      | 13      | 14      |    |
|                         |     |     | Below normal, n |         | 1       |         | 1       |         | 1       |         | 1       |         | 1       |    |
|                         |     |     | Below normal, % |         | 7       |         | 7       |         | 7       |         | 8       |         | 7       |    |
|                         |     |     | Above normal, n |         |         |         |         |         |         |         |         |         |         | 1  |
|                         |     |     | Above normal, % |         |         |         |         |         |         |         |         |         |         | 7  |
| Mean corpuscular volume | 78  | 100 | Total, n        | 14      | 14      | 14      | 14      | 13      | 14      | 12      | 13      | 13      | 14      |    |



| Variable                 | LLN | ULN | Summary         | Day 0   |         | Day 7   |         | Day 28  |         | Day 35  |         | Day 42  |         |
|--------------------------|-----|-----|-----------------|---------|---------|---------|---------|---------|---------|---------|---------|---------|---------|
|                          |     |     |                 | Placebo | AZD4017 | Placebo | AZD4017 | Placebo | AZD4017 | Placebo | AZD4017 | Placebo | AZD4017 |
|                          |     |     | Below normal, % |         |         |         |         |         |         |         |         |         |         |
|                          |     |     | Above normal, n | 1       | 4       | 3       | 3       | 1       | 1       | 3       | 3       | 1       | 1       |
|                          |     |     | Above normal, % | 7       | 29      | 21      | 21      | 8       | 7       | 25      | 23      | 8       | 7       |
| Albumin                  | 35  | 50  | Total, n        | 14      | 14      | 14      | 14      | 13      | 14      | 12      | 13      | 13      | 13      |
|                          |     |     | Below normal, n |         |         |         |         | 1       |         |         |         |         |         |
|                          |     |     | Below normal, % |         |         |         |         | 8       |         |         |         |         |         |
|                          |     |     | Above normal, n |         |         |         |         |         |         |         |         |         |         |
|                          |     |     | Above normal, % |         |         |         |         |         |         |         |         |         |         |
| Bilirubin                | 2   | 21  | Total, n        | 14      | 14      | 14      | 14      | 13      | 14      | 12      | 13      | 13      | 13      |
|                          |     |     | Below normal, n |         |         |         |         |         |         |         |         |         |         |
|                          |     |     | Below normal, % |         |         |         |         |         |         |         |         |         |         |
|                          |     |     | Above normal, n |         |         |         | 1       |         | 1       | 1       |         |         |         |
|                          |     |     | Above normal, % |         |         |         | 7       |         | 7       | 8       |         |         |         |
| Alkaline phosphatase     | 30  | 130 | Total, n        | 14      | 14      | 14      | 14      | 13      | 14      | 12      | 13      | 13      | 13      |
|                          |     |     | Below normal, n |         |         |         |         |         | 1       |         | 1       |         |         |
|                          |     |     | Below normal, % |         |         |         |         |         | 7       |         | 8       |         |         |
|                          |     |     | Above normal, n | 1       |         | 1       |         |         |         |         |         | 1       | 1       |
|                          |     |     | Above normal, % | 7       |         | 7       |         |         |         |         |         | 8       | 8       |
| Alanine aminotransferase | N/A | 40  | Total, n        | 14      | 14      | 14      | 14      | 13      | 14      | 12      | 13      | 13      | 13      |
|                          |     |     | Above normal, n |         | 2       |         | 1       |         | 2       |         | 1       |         | 2       |
|                          |     |     | Above normal, % |         | 14      |         | 7       |         | 14      |         | 8       |         | 15      |





| Variable       | LLN | ULN | Summary         | Day 0   |         | Day 7   |         | Day 28  |         | Day 35  |         | Day 42  |         |
|----------------|-----|-----|-----------------|---------|---------|---------|---------|---------|---------|---------|---------|---------|---------|
|                |     |     |                 | Placebo | AZD4017 | Placebo | AZD4017 | Placebo | AZD4017 | Placebo | AZD4017 | Placebo | AZD4017 |
|                |     |     | Below normal, % |         |         |         |         |         |         |         |         |         |         |
|                |     |     | Above normal, n |         | 1       | 3       |         | 2       |         |         |         | 1       |         |
|                |     |     | Above normal, % |         | 7       | 21      |         | 14      |         |         |         | 8       |         |
| Urea           | 2.5 | 7.8 | Total, n        | 14      | 14      | 14      | 14      | 13      | 14      | 12      | 13      | 13      | 14      |
|                |     |     | Below normal, n |         |         |         |         |         |         |         |         |         |         |
|                |     |     | Below normal, % |         |         |         |         |         |         |         |         |         |         |
|                |     |     | Above normal, n | 3       | 5       | 4       | 5       | 3       | 4       | 2       | 7       | 3       | 5       |
|                |     |     | Above normal, % | 21      | 36      | 29      | 36      | 23      | 29      | 17      | 54      | 23      | 36      |
| Creatinine_M   | 64  | 104 | Total, n        | 12      | 10      | 12      | 10      | 11      | 10      | 10      | 9       | 11      | 10      |
|                |     |     | Below normal, n | 2       | 3       | 2       | 1       | 2       | 1       | 1       | 1       | 1       | 2       |
|                |     |     | Below normal, % | 17      | 30      | 17      | 10      | 18      | 10      | 10      | 11      | 9       | 20      |
|                |     |     | Above normal, n |         | 2       | 2       | 3       | 1       | 2       | 2       | 3       | 1       | 1       |
|                |     |     | Above normal, % |         | 20      | 17      | 30      | 9       | 20      | 20      | 33      | 9       | 10      |
| Creatinine_F   | 49  | 90  | Total, n        | 2       | 4       | 2       | 4       | 2       | 4       | 2       | 4       | 2       | 4       |
|                |     |     | Below normal, n |         |         |         |         |         |         |         |         |         |         |
|                |     |     | Below normal, % |         |         |         |         |         |         |         |         |         |         |
|                |     |     | Above normal, n |         |         |         |         |         |         |         | 1       |         | 1       |
|                |     |     | Above normal, % |         |         |         |         |         |         |         | 25      |         | 25      |
| Testosterone_M | 8   | 30  | Total, n        | 12      | 10      | 12      | 10      | 11      | 10      | 10      | 9       | 11      | 10      |
|                |     |     | Below normal, n | 1       | 2       | 2       | 4       | 2       | 4       | 1       | 3       | 3       | 2       |
|                |     |     | Below normal, % | 8       | 20      | 17      | 40      | 18      | 40      | 10      | 33      | 27      | 20      |

| Variable                                  | LLN | ULN | Summary         | Day 0   |         | Day 7   |         | Day 28  |         | Day 35  |         | Day 42  |         |
|-------------------------------------------|-----|-----|-----------------|---------|---------|---------|---------|---------|---------|---------|---------|---------|---------|
|                                           |     |     |                 | Placebo | AZD4017 | Placebo | AZD4017 | Placebo | AZD4017 | Placebo | AZD4017 | Placebo | AZD4017 |
|                                           |     |     | Above normal, n |         |         |         |         |         |         | 1       |         |         |         |
|                                           |     |     | Above normal, % |         |         |         |         |         |         | 10      |         |         |         |
| Testosterone_F                            | N/A | 2.8 | Total, n        | 2       | 4       | 2       | 4       | 1       | 4       | 2       | 4       | 2       | 4       |
|                                           |     |     | Above normal, n |         |         |         |         |         |         |         |         |         |         |
|                                           |     |     | Above normal, % |         |         |         |         |         |         |         |         |         |         |
| Dehydroepiandrosterone sulphate (males)   | 3.6 | 13  | Total, n        | 12      | 10      | 12      | 10      | 11      | 10      | 10      | 9       | 11      | 10      |
|                                           |     |     | Below normal, n | 5       | 7       | 5       | 4       | 6       | 2       | 4       | 2       | 8       | 6       |
|                                           |     |     | Below normal, % | 42      | 70      | 42      | 40      | 55      | 20      | 40      | 22      | 73      | 60      |
|                                           |     |     | Above normal, n |         |         |         | 1       |         |         |         |         |         |         |
|                                           |     |     | Above normal, % |         |         |         | 10      |         |         |         |         |         |         |
| Dehydroepiandrosterone sulphate (females) | 2.7 | 11  | Total, n        | 2       | 4       | 2       | 4       | 2       | 4       | 2       | 4       | 2       | 4       |
|                                           |     |     | Below normal, n | 2       | 3       | 2       | 1       | 2       | 2       | 2       | 2       | 2       | 3       |
|                                           |     |     | Below normal, % | 100     | 75      | 100     | 25      | 100     | 50      | 100     | 50      | 100     | 75      |
|                                           |     |     | Above normal, n |         |         |         |         |         |         |         |         |         |         |
|                                           |     |     | Above normal, % |         |         |         |         |         |         |         |         |         |         |
| Free thyroxine                            | 10  | 20  | Total, n        | 14      | 14      | 14      | 13      | 12      | 12      | 12      | 13      | 13      | 14      |
|                                           |     |     | Below normal, n |         |         |         |         |         |         |         |         |         |         |
|                                           |     |     | Below normal, % |         |         |         |         |         |         |         |         |         |         |
|                                           |     |     | Above normal, n |         |         |         | 1       |         |         |         |         |         |         |

| Variable                    | LLN | ULN | Summary         | Day 0   |         | Day 7   |         | Day 28  |         | Day 35  |         | Day 42  |         |
|-----------------------------|-----|-----|-----------------|---------|---------|---------|---------|---------|---------|---------|---------|---------|---------|
|                             |     |     |                 | Placebo | AZD4017 | Placebo | AZD4017 | Placebo | AZD4017 | Placebo | AZD4017 | Placebo | AZD4017 |
|                             |     |     | Above normal, % |         |         |         | 8       |         |         |         |         |         |         |
| Thyroid-stimulating hormone | .2  | 4   | Total, n        | 14      | 14      | 14      | 13      | 12      | 12      | 12      | 13      | 13      | 14      |
|                             |     |     | Below normal, n |         |         |         |         |         |         |         |         |         |         |
|                             |     |     | Below normal, % |         |         |         |         |         |         |         |         |         |         |
|                             |     |     | Above normal, n |         |         |         |         |         |         |         |         |         |         |
|                             |     |     | Above normal, % |         |         |         |         |         |         |         |         |         |         |

LLN, lower limit of normal; ULN, upper limit of normal.

**Table S16: Sample sizes for future trials based on estimates from available case data in full analysis set**

At an alpha of 0.05 (5% significance) and 1-beta of 0.90 (90% power), sample sizes for a range of substantive between-group differences are presented that allow for a 10% dropout rate. For TEWL and integrity variables, means and standard deviations (SDs) are presented on the log scale. For all variables, sample size is based on mean and SD (and Pearson's r where applicable), as specified in the statistical analysis plan. However, some variables were not normally distributed which may limit the accuracy of these estimates. Sample size estimates presented here should be considered preliminary.

| Variable                                                              | Relative difference | Placebo mean | AZD4017 mean | Pooled SD | R*   | N per arm |
|-----------------------------------------------------------------------|---------------------|--------------|--------------|-----------|------|-----------|
| 11bHSD1 activity radioassay (percent conversion per 24 hours): Day 28 | 10%                 | 12.38        | 11.14        | 5.13      | 0.07 | 399       |
|                                                                       | 20%                 | 12.38        | 9.90         | 5.13      | 0.07 | 100       |
|                                                                       | 30%                 | 12.38        | 8.66         | 5.13      | 0.07 | 46        |
| 11bHSD1 activity ELISA (percent conversion per 24 hours): Day 28      | 10%                 | 15.27        | 13.74        | 25.85     | 0.36 | 5821      |
|                                                                       | 20%                 | 15.27        | 12.22        | 25.85     | 0.36 | 1456      |
|                                                                       | 30%                 | 15.27        | 10.69        | 25.85     | 0.36 | 648       |
| Sudomotor function Left Hand (μS): Day 35                             | 10%                 | 56.46        | 62.11        | 12.83     | 0.42 | 100       |
|                                                                       | 20%                 | 56.46        | 67.75        | 12.83     | 0.42 | 26        |
|                                                                       | 30%                 | 56.46        | 73.40        | 12.83     | 0.42 | 12        |
| Sudomotor function Right Hand (μS): Day 35                            | 10%                 | 54.08        | 59.48        | 14.07     | 0.61 | 100       |
|                                                                       | 20%                 | 54.08        | 64.89        | 14.07     | 0.61 | 26        |
|                                                                       | 30%                 | 54.08        | 70.30        | 14.07     | 0.61 | 11        |
| Sudomotor function Hands (μS): Day 35                                 | 10%                 | 55.27        | 60.80        | 13.26     | 0.52 | 99        |
|                                                                       | 20%                 | 55.27        | 66.32        | 13.26     | 0.52 | 26        |
|                                                                       | 30%                 | 55.27        | 71.85        | 13.26     | 0.52 | 11        |
| Sudomotor function Left Foot (μS): Day 35                             | 10%                 | 68.69        | 75.56        | 15.26     | 0.67 | 63        |
|                                                                       | 20%                 | 68.69        | 82.43        | 15.26     | 0.67 | 16        |
|                                                                       | 30%                 | 68.69        | 89.30        | 15.26     | 0.67 | 8         |
| Sudomotor function Right Foot (μS): Day 35                            | 10%                 | 69.31        | 76.24        | 16.69     | 0.77 | 56        |
|                                                                       | 20%                 | 69.31        | 83.17        | 16.69     | 0.77 | 14        |

| <b>Variable</b>                               | <b>Relative<br/>difference</b> | <b>Placebo<br/>mean</b> | <b>AZD4017<br/>mean</b> | <b>Pooled<br/>SD</b> | <b>R*</b> | <b>N per<br/>arm</b> |
|-----------------------------------------------|--------------------------------|-------------------------|-------------------------|----------------------|-----------|----------------------|
|                                               | 30%                            | 69.31                   | 90.10                   | 16.69                | 0.77      | 7                    |
| Sudomotor function Feet ( $\mu$ S): Day 35    | 10%                            | 69.00                   | 75.90                   | 15.82                | 0.72      | 59                   |
|                                               | 20%                            | 69.00                   | 82.80                   | 15.82                | 0.72      | 14                   |
|                                               | 30%                            | 69.00                   | 89.70                   | 15.82                | 0.72      | 7                    |
| Sudomotor function Overall ( $\mu$ S): Day 35 | 10%                            | 62.13                   | 68.35                   | 12.82                | 0.70      | 50                   |
|                                               | 20%                            | 62.13                   | 74.56                   | 12.82                | 0.70      | 13                   |
|                                               | 30%                            | 62.13                   | 80.78                   | 12.82                | 0.70      | 6                    |
| Skin hydration (A.U): Day 35                  | 10%                            | 38.19                   | 42.01                   | 9.90                 | 0.55      | 110                  |
|                                               | 20%                            | 38.19                   | 45.83                   | 9.90                 | 0.55      | 28                   |
|                                               | 30%                            | 38.19                   | 49.65                   | 9.90                 | 0.55      | 12                   |
| Epidermal thickness ( $\mu$ m): Day 35        | 10%                            | 61.72                   | 67.90                   | 9.43                 | 0.07      | 56                   |
|                                               | 20%                            | 61.72                   | 74.07                   | 9.43                 | 0.07      | 14                   |
|                                               | 30%                            | 61.72                   | 80.24                   | 9.43                 | 0.07      | 7                    |
| Wound gap diameter (mm): Day 2                | 10%                            | 1.49                    | 1.34                    | 0.71                 | N/A       | 529                  |
|                                               | 20%                            | 1.49                    | 1.19                    | 0.71                 | N/A       | 132                  |
|                                               | 30%                            | 1.49                    | 1.04                    | 0.71                 | N/A       | 59                   |
| Wound depth (mm): Day 7                       | 10%                            | 0.60                    | 0.54                    | 0.20                 | N/A       | 262                  |
|                                               | 20%                            | 0.60                    | 0.48                    | 0.20                 | N/A       | 66                   |
|                                               | 30%                            | 0.60                    | 0.42                    | 0.20                 | N/A       | 30                   |
| Wound gap diameter (mm): Day 30               | 10%                            | 1.44                    | 1.30                    | 0.60                 | N/A       | 409                  |
|                                               | 20%                            | 1.44                    | 1.16                    | 0.60                 | N/A       | 102                  |
|                                               | 30%                            | 1.44                    | 1.01                    | 0.60                 | N/A       | 46                   |
| Wound depth (mm): Day 35                      | 10%                            | 0.60                    | 0.54                    | 0.19                 | N/A       | 233                  |
|                                               | 20%                            | 0.60                    | 0.48                    | 0.19                 | N/A       | 59                   |
|                                               | 30%                            | 0.60                    | 0.42                    | 0.19                 | N/A       | 27                   |
| Hour 3 TEWL (Set 1; Day 0)                    | 10%                            | 3.55                    | 3.45                    | 0.24                 | 0.25      | 119                  |
|                                               | 20%                            | 3.55                    | 3.33                    | 0.24                 | 0.25      | 27                   |
|                                               | 30%                            | 3.55                    | 3.20                    | 0.24                 | 0.25      | 10                   |
| Hour 48 TEWL (Set 1; Day 2)                   | 10%                            | 2.99                    | 2.88                    | 0.34                 | 0.32      | 220                  |
|                                               | 20%                            | 2.99                    | 2.76                    | 0.34                 | 0.32      | 50                   |
|                                               | 30%                            | 2.99                    | 2.63                    | 0.34                 | 0.32      | 20                   |
| Hour 168 TEWL (Set 1; Day 7)                  | 10%                            | 2.61                    | 2.50                    | 0.55                 | 0.40      | 541                  |
|                                               | 20%                            | 2.61                    | 2.38                    | 0.55                 | 0.40      | 121                  |
|                                               | 30%                            | 2.61                    | 2.25                    | 0.55                 | 0.40      | 48                   |
| Hour 3 TEWL (Set 2; Day 28)                   | 10%                            | 3.17                    | 3.06                    | 0.41                 | 0.12      | 351                  |

| <b>Variable</b>                                         | <b>Relative<br/>difference</b> | <b>Placebo<br/>mean</b> | <b>AZD4017<br/>mean</b> | <b>Pooled<br/>SD</b> | <b>R*</b> | <b>N per<br/>arm</b> |
|---------------------------------------------------------|--------------------------------|-------------------------|-------------------------|----------------------|-----------|----------------------|
|                                                         | 20%                            | 3.17                    | 2.95                    | 0.41                 | 0.12      | 79                   |
|                                                         | 30%                            | 3.17                    | 2.81                    | 0.41                 | 0.12      | 31                   |
| Hour 48 TEWL (Set 2; Day 30)                            | 10%                            | 2.67                    | 2.56                    | 0.41                 | 0.26      | 329                  |
|                                                         | 20%                            | 2.67                    | 2.45                    | 0.41                 | 0.26      | 73                   |
|                                                         | 30%                            | 2.67                    | 2.31                    | 0.41                 | 0.26      | 29                   |
| Hour 168 TEWL (Set 2; Day 35)                           | 10%                            | 2.30                    | 2.20                    | 0.40                 | 0.17      | 334                  |
|                                                         | 20%                            | 2.30                    | 2.08                    | 0.40                 | 0.17      | 74                   |
|                                                         | 30%                            | 2.30                    | 1.95                    | 0.40                 | 0.17      | 29                   |
| Hour 0 TEWL (Set 3; Day 35)                             | 10%                            | 1.94                    | 1.84                    | 0.42                 | -0.12     | 374                  |
|                                                         | 20%                            | 1.94                    | 1.72                    | 0.42                 | -0.12     | 84                   |
|                                                         | 30%                            | 1.94                    | 1.59                    | 0.42                 | -0.12     | 33                   |
| Number of tapes required for barrier disruption: Day 28 | 10%                            | 3.63                    | 3.73                    | 0.49                 | 0.42      | 500                  |
|                                                         | 20%                            | 3.63                    | 3.82                    | 0.49                 | 0.42      | 138                  |
|                                                         | 30%                            | 3.63                    | 3.90                    | 0.49                 | 0.42      | 66                   |

\*Correlation with baseline value (not applicable for wound healing measures)
